# Supplementary material for: Market optimization and technoeconomic analysis of hydrogen-electricity coproduction systems
Source: Royal Society of Chemistry journal article supplement (doi:10.1039/d4ee02394c), 2024-01-01
Supplement: d4ee02394c2.xlsx [file d4ee02394c2.xlsx]

## Sheet: Raw Data
	NGCC (M$/yr)	SOFC (M$/yr)	NGCC + SOEC (M$/yr)	rSOC (M$/yr)	SOFC+SOEC (M$/yr)	SOEC (M$/yr)	Natural Gas Price ($/MMBtu)	Carbon Tax ($/tonne)	Hydrogen Price ($/kg)	Mean LMP ($/MWh)	Minimum LMP ($/MWh)	25th Percentile ($/MWh)	50th Percentile ($/MWh)	75th Percentile ($/MWh)	Maximum LMP ($/MWh)	Standard Deviation ($/MWh)	Skewness	Kurtosis	Bimodality Coefficient	Dip Test Statistic
BaseCaseCapRes_2030_10	-171.19	-95.5684	-223.172	-84.2867	-89.4776	-35.3808	2.94	0	1	20.1099	-330.008	17.744	19.981	23.246	111.651	8.71278	-16.8003	641.208	0.439685	0.0523286
BaseCaseTaxCapRes_2030_10	-74.6752	26.8196	-126.569	38.6545	25.1485	-63.419	2.94	60	1	40.8521	-1.44e-06	37.342	40.1	45.541	209.1	23.2445	2.21713	13.8002	0.352095	0.060627
BaseCaseTax_2030_10	-35.5021	65.8521	-87.4759	78.0599	68.2541	-64.8737	2.94	60	1	47.6871	-1.02e-07	37.342	43.4	47.28	1800	82.4753	15.4157	277.577	0.850543	0.0589257
BaseCase_2030_10	-121.134	-33.2032	-172.073	-16.6452	-27.8692	-46.0577	2.94	0	1	30.2498	-113.282	19.025	24.1294	30.1	1349.59	80.5222	12.4831	162.055	0.950142	0.0361871
CAISO_NP15_2019_10	-124.37	-30.2633	-182.138	-21.7397	-37.307	-54.287	3.87	0	1	35.5941	-43.3701	22.9445	30.8378	41.7378	1013.67	37.846	13.8163	281.649	0.674126	0.00525771
CAISO_NP15_2022_10	36.598	170.806	-22.8254	171.467	172.301	-66.9158	7.47	0	1	89.6334	-16.3892	51.3034	69.9768	91.9737	1971.89	106.444	9.23867	129.129	0.653545	0.00420326
CAISO_SP15_2019_10	-121.715	-28.6865	-180.046	-16.9714	-34.4631	-54.7688	3.87	0	1	35.7629	-36.4988	21.9076	30.8134	42.2941	980.315	39.3494	13.0501	246.636	0.68622	0.00572128
CAISO_SP15_2022_10	23.55	147.883	-40.3133	155.762	149.351	-65.6732	7.47	0	1	84.2986	-27.4744	46.0654	65.9697	90.0033	1994.73	104.727	8.68144	119.572	0.623036	0.00408991
CAISO_ZP26_2019_10	-123.959	-31.0274	-182.251	-20.9413	-37.0163	-54.3595	3.87	0	1	35.3162	-40.6231	21.9893	30.6805	41.6525	1065.91	38.8525	14.0379	289.042	0.678195	0.00520961
CAISO_ZP26_2022_10	10.3654	132.761	-54.2149	143.021	133.859	-64.6688	7.47	0	1	81.3012	-35.0853	45.0083	65.3063	86.9177	1976.53	101.724	9.08334	129.987	0.627931	0.00353733
ERCOT_HOUSTON_2019_10	-121.2	-34.1254	-156.286	-22.6876	-21.3649	-41.3452	2.39	0	1	28.1962	-71.9689	16.9036	19.634	24.9981	4694.64	107.056	31.5961	1156.48	0.861864	0.00160583
ERCOT_HOUSTON_2022_10	-61.9691	37.2591	-124.853	39.7402	24.7693	-64.9995	7.05	0	1	61.9753	-28.7943	30.7843	46.5179	68.535	4835.43	146.369	20.3951	525.174	0.789439	0.00336158
ERCOT_NORTH_2019_10	-122.15	-37.5806	-156.606	-22.3237	-22.1513	-37.9322	2.39	0	1	27.5317	-10.4186	16.1815	19.1182	24.5337	4696.89	106.893	31.9975	1178.31	0.867546	0.00347416
ERCOT_NORTH_2022_10	-91.3785	3.21574	-154.635	9.12623	-12.2294	-62.182	7.05	0	1	55.0602	-464.73	28.1067	44.2324	64.2469	5073.44	130.888	25.9057	819.627	0.817022	0.00478209
ERCOT_SOUTH_2019_10	-124.387	-37.6088	-159.153	-25.5782	-24.755	-40.2993	2.39	0	1	27.5674	-50.289	16.8211	19.5852	24.8401	4694.81	105.741	32.5313	1210.85	0.872668	0.00149098
ERCOT_SOUTH_2022_10	-97.146	-3.88626	-159.31	3.31948	-19.5172	-60.6537	7.05	0	1	53.5081	-31.1793	28.1462	43.3772	63.0541	4680.66	114.065	25.2363	817.195	0.777704	0.00380378
ERCOT_WEST_2019_10	-121.286	-41.0073	-155.893	-13.3073	-19.2049	-28.7802	2.39	0	1	26.2011	-24.6412	14.5192	18.7915	24.5414	4697.2	107.584	31.6666	1160.65	0.862612	0.0051146
ERCOT_WEST_2022_10	-90.4182	-2.50259	-158.351	26.5518	-10.6334	-43.4182	7.05	0	1	50.3809	-47.6123	22.8137	42.129	64.0505	5143.3	132.176	25.5024	807.542	0.803622	0.0337839
HighSolarCapRes_2030_10	-169.923	-95.7993	-221.702	-83.9343	-87.7804	-33.2134	2.94	0	1	19.9601	-266.216	17.684	19.618	22.211	123.821	8.8207	-4.11651	250.057	0.0709152	0.058774
HighSolarTaxCapRes_2030_10	-79.2896	16.0839	-130.956	38.652	21.1962	-54.3168	2.94	60	1	38.285	-1.95096	33.0251	39.912	46.684	205.299	25.2377	1.6091	9.19151	0.294376	0.0641126
HighSolarTax_2030_10	-38.9671	56.6677	-90.99	78.9539	65.4831	-57.2605	2.94	60	1	45.4338	-6.02e-07	34.1537	40.1	47.731	1800	85.8702	13.8727	229.218	0.833057	0.0653255
HighSolar_2030_10	-117.857	-33.569	-169.168	-15.3698	-25.2735	-43.0291	2.94	0	1	30.1282	-111.287	18.772	22.773	27.4103	1800	91.8303	14.2466	224.056	0.898297	0.0461758
HighWindCapRes_2030_10	-171.19	-95.5684	-223.172	-84.2867	-89.4776	-35.3808	2.94	0	1	20.1099	-330.008	17.744	19.981	23.246	111.651	8.71278	-16.8003	641.208	0.439685	0.0523287
HighWindTaxCapRes_2030_10	-82.854	12.6271	-134.368	36.8344	18.2229	-56.5899	2.94	60	1	37.4891	-3.8e-06	36.589	40.1	46.577	202.88	23.9098	1.27489	8.24416	0.233463	0.0877206
HighWindTax_2030_10	-37.9644	56.4357	-89.2861	82.5695	67.6018	-57.0774	2.94	60	1	45.0606	-1.61e-07	36.589	43.4	48.711	1800	89.5046	15.129	263.435	0.862821	0.0913238
HighWind_2030_10	-121.134	-33.2032	-172.073	-16.6452	-27.8692	-46.0577	2.94	0	1	30.2498	-113.282	19.025	24.1294	30.1	1349.59	80.5222	12.4831	162.055	0.950142	0.0361872
ISO_NE_2019_10	-146.038	-71.525	-201.323	-59.8323	-85.722	-51.8162	4.5	0	1	30.6752	-56.16	19.0475	24.55	35.94	261.35	20.5617	2.80591	13.0445	0.552997	0.00176363
ISO_NE_2022_10	-52.3806	61.7987	-114.888	58.8693	40.7161	-67.1622	10.76	0	1	84.9154	-150.91	49.545	65.87	98.705	2254.35	64.9244	6.74101	157.497	0.289357	0.00223866
MiNg_$100_CAISO_2035_10	51.3644	129.691	8.93216	182.98	168.712	-26.7083	2.26	100	1	52.9726	0	1.17	73.585	91.23	178.28	43.7191	-0.199732	-1.56826	0.725793	0.156735
MiNg_$100_ERCOT_2035_10	-56.5216	16.2917	-103.687	84.205	53.0669	-11.1462	2.64	100	1	33.6606	0	0	30.385	70.13	186.42	35.2975	0.482471	-0.945429	0.599717	0.07461
MiNg_$100_MISO-W_2035_10	-27.5124	42.9089	-56.2625	109.683	88.2821	-2.81014	1.69	100	1	35.1235	0	0	42.12	69.24	145.07	34.4469	0.142891	-1.71473	0.793295	0.100222
MiNg_$100_NYISO_2035_10	-8.99006	56.0444	-20.8843	135.401	117.392	2.08329	1.12	100	1	35.2188	0	0	1.41	74.6625	182.14	40.0583	0.487904	-1.19525	0.685603	0.114546
MiNg_$100_PJM-W_2035_10	31.7013	111.859	-1.93203	145.811	141.664	-37.5564	1.42	100	1	48.0117	0	8.06	63.575	76.9025	172.29	33.4736	-0.325041	-1.42697	0.702421	0.116823
MiNg_$150_CAISO_2035_10	31.02	100.405	-8.89821	178.571	153.204	2.66828	2.26	150	1	45.3465	0	0	1.53	105.405	203.01	53.7364	0.44352	-1.6434	0.881469	0.116924
MiNg_$150_ERCOT_2035_10	-23.7152	41.9412	-72.3422	127.267	91.6264	10.1549	2.64	150	1	36.1843	0	0	0.18	92.95	204.49	46.6016	0.660465	-1.31376	0.851208	0.095942
MiNg_$150_MISO-W_2035_10	-53.4896	8.90302	-83.8938	101.177	66.9418	24.7754	2.01	150	1	28.1323	0	0	0.25	70.01	162.06	40.3893	0.919726	-0.924047	0.888739	0.0613147
MiNg_$150_NYISO_2035_10	-8.63188	50.801	-15.1909	148.422	126.271	20.473	1.14	150	1	33.6724	0	0	0.27	92.62	229.17	48.6042	0.9018	-0.822167	0.832197	0.0861544
MiNg_$150_PJM-W_2035_10	52.3102	126.339	23.3294	178.258	172.057	-18.4721	1.43	150	1	49.8141	0	0.15	47.84	98.48	181.06	45.7614	0.106801	-1.75696	0.812981	0.109773
MISO_INDIANA_2019_10	-151.698	-55.7624	-197.787	-56.4969	-113.76	-57.02	2.73	0	1	26.4054	2.26	20.95	23.33	26.67	936.4	21.6542	19.4117	575.727	0.652834	0.00205479
MISO_INDIANA_2022_10	-70.486	49.3431	-135.923	44.9464	37.4759	-67.2361	8.04	0	1	71.4631	-4.43	44.3475	58.255	81.5925	2411.71	70.2745	14.6369	366.39	0.582687	0.0024691
MISO_LOUISIANA_2019_10	-157.451	-64.4088	-203.438	-63.5517	-68.4625	-52.7746	2.73	0	1	24.8589	-31.26	20.1	22.67	25.8225	968.31	18.6434	23.6336	909.84	0.612975	0.00234946
MISO_LOUISIANA_2022_10	-106.222	1.79451	-169.93	-2.86492	-14.959	-67.245	8.04	0	1	62.4765	-3.03	40.29	52.905	71.82	2009.43	60.1612	16.3725	397.407	0.671959	0.00181516
MISO_MINNESOTA_2019_10	-165.037	-102.055	-219.634	-82.5895	-109.729	-37.5799	3.73	0	1	21.9714	-38.56	17.17	20.185	23.66	661.22	16.9596	19.5937	593.609	0.645171	0.00192215
MISO_MINNESOTA_2022_10	-135.673	-63.367	-203.842	-47.7067	-85.031	-58.913	8.04	0	1	44.0975	-62.28	23.52	36.915	55.6825	1781.78	49.0906	14.5568	395.169	0.5347	0.00196058
NETL_ERCOT_GEN_0_10	-167.036	-76.3719	-218.669	-76.8022	-96.9463	-64.9885	4.42	0	1	31.1397	0.126198	27.8705	30.1394	34.3657	193.137	8.6573	1.34638	27.2128	0.0930944	0.0100272
NETL_ERCOT_GEN_100_10	-10.2261	110.845	-69.4546	103.946	102.392	-66.851	4.42	100	1	64.341	0.126314	52.6912	67.5342	75.2203	1167.41	27.1999	11.4191	386.907	0.336991	0.0222389
NETL_ERCOT_GEN_250_10	256.862	377.951	187.538	365.929	389.241	-66.9622	4.42	250	1	111.265	0.126314	80.8868	125.269	140.145	1289.15	56.1503	4.56794	90.9332	0.232781	0.0387437
NETL_ERCOT_GEN_25_10	-139.818	-23.6707	-199.123	-27.7164	-41.9843	-66.7428	4.42	25	1	40.702	0.126314	34.7532	40.6694	45.8509	345.554	11.9194	4.1028	88.4141	0.195077	0.0125112
NETL_ERCOT_GEN_50_10	-98.8082	20.3876	-156.766	15.3671	5.22063	-66.8138	4.42	50	1	48.4546	0.126314	41.4196	50.3226	54.4781	841.245	17.649	12.8409	513.117	0.321417	0.0233085
NYISO_2019_10	-162.099	-90.7837	-214.988	-57.5424	-76.7915	-24.6363	3.05	0	1	20.0901	-186.74	14.07	19.18	24.56	356.71	14.8361	3.19974	76.6679	0.141063	0.00197746
NYISO_2022_10	-87.5713	1.92234	-153.949	26.8582	-9.02395	-47.0104	7.57	0	1	53.6445	-410.7	24.7	43.98	66.5375	2829.46	73.7528	15.1126	457.642	0.497978	0.0041326
PJM_WEST_2019_10	-143.545	-46.9634	-183.254	-46.07	-48.9721	-53.914	2.43	0	1	26.38	-52.9956	19.6223	23.1215	27.5677	746.585	22.9533	17.2221	426.54	0.692835	0.00274863
PJM_WEST_2022_10	-34.9044	91.1922	-98.1957	86.5451	83.4063	-67.1533	7.04	0	1	74.2523	-20.2954	44.4271	58.1489	81.3789	3794.43	118.222	19.7849	478.581	0.814902	0.00247495
SPP_NORTH_2019_10	-147.454	-79.6	-190.78	-34.7299	-52.0916	-14.2431	2.75	0	1	20.1862	-46.4777	12.2819	16.905	21.6298	1130.72	31.469	14.1731	356.423	0.561665	0.00242402
SPP_NORTH_2022_10	-128.564	-64.9629	-202.578	-15.6298	-83.0155	-20.1815	8.21	0	1	35.7142	-102.798	9.72215	25.5635	52.3684	1161.63	50.0989	5.22841	66.2783	0.409015	0.00176584
SPP_SOUTH_2019_10	-142.08	-72.1162	-188.091	-27.511	-46.0472	-16.9136	2.83	0	1	21.4836	-43.7243	12.8588	18.4743	23.2245	1210.58	35.3158	13.0933	308.231	0.554039	0.00162879
SPP_SOUTH_2022_10	-78.1504	2.89315	-155.493	40.6307	-1.48359	-42.9617	7.61	0	1	52.4427	-38.083	19.2189	40.4408	69.9561	1356.88	60.5277	4.11552	45.5524	0.369439	0.0017095
WinterNYCapRes_2030_10	-165.958	-84.3387	-219.274	-80.9981	-83.8053	-44.1545	2.94	0	1	22.3565	1.06e-08	19.025	20.525	23.6601	135.512	9.70417	6.37768	56.9343	0.69533	0.0300593
WinterNYTaxCapRes_2030_10	-71.6226	30.9754	-123.731	39.9076	27.7303	-63.7965	2.94	60	1	41.8251	7.11e-08	37.718	43.683	47.4337	223.234	21.0337	1.76945	10.4959	0.306065	0.0453158
WinterNYTax_2030_10	-39.061	65.1672	-91.6141	71.3843	63.1987	-66.8241	2.94	60	1	48.004	1.36e-08	44.036	46.224	51.965	1800	44.4711	22.4425	734.263	0.684513	0.0355123
WinterNY_2030_10	-142.263	-46.9502	-195.445	-51.4701	-56.3249	-59.3643	2.94	0	1	29.0879	2.6e-07	21.548	23.726	28.2427	4257.43	81.723	31.5358	1215.07	0.817279	0.0356353
BaseCaseCapRes_2030_15	-171.19	-95.5684	-147.511	-21.2412	-12.3233	42.203	2.94	0	1.5	20.1099	-330.008	17.744	19.981	23.246	111.651	8.71278	-16.8003	641.208	0.439685	0.0523286
BaseCaseTaxCapRes_2030_15	-74.6752	26.8196	-112.834	50.3561	38.2584	-45.0301	2.94	60	1.5	40.8521	-1.44e-06	37.342	40.1	45.541	209.1	23.2445	2.21713	13.8002	0.352095	0.060627
BaseCaseTax_2030_15	-35.5021	65.8521	-73.6738	90.1735	81.327	-49.9578	2.94	60	1.5	47.6871	-1.02e-07	37.342	43.4	47.28	1800	82.4753	15.4157	277.577	0.850543	0.0589257
BaseCase_2030_15	-121.134	-33.2032	-108.638	21.3779	34.7015	17.8555	2.94	0	1.5	30.2498	-113.282	19.025	24.1294	30.1	1349.59	80.5222	12.4831	162.055	0.950142	0.0361871
CAISO_NP15_2019_15	-124.37	-30.2633	-150.635	5.31453	2.28614	-16.3424	3.87	0	1.5	35.5941	-43.3701	22.9445	30.8378	41.7378	1013.67	37.846	13.8163	281.649	0.674126	0.00525771
CAISO_NP15_2022_15	36.598	170.806	-22.3176	175.102	176.31	-64.0181	7.47	0	1.5	89.6334	-16.3892	51.3034	69.9768	91.9737	1971.89	106.444	9.23867	129.129	0.653545	0.00420326
CAISO_SP15_2019_15	-121.715	-28.6865	-147.992	9.73303	5.3141	-16.0432	3.87	0	1.5	35.7629	-36.4988	21.9076	30.8134	42.2941	980.315	39.3494	13.0501	246.636	0.68622	0.00572128
CAISO_SP15_2022_15	23.55	147.883	-38.5599	165.086	155.196	-56.8117	7.47	0	1.5	84.2986	-27.4744	46.0654	65.9697	90.0033	1994.73	104.727	8.68144	119.572	0.623036	0.00408991
CAISO_ZP26_2019_15	-123.959	-31.0274	-149.95	7.53273	3.15902	-14.6783	3.87	0	1.5	35.3162	-40.6231	21.9893	30.6805	41.6525	1065.91	38.8525	14.0379	289.042	0.678195	0.00520961
CAISO_ZP26_2022_15	10.3654	132.761	-52.1292	153.169	139.249	-54.8612	7.47	0	1.5	81.3012	-35.0853	45.0083	65.3063	86.9177	1976.53	101.724	9.08334	129.987	0.627931	0.00353733
ERCOT_HOUSTON_2019_15	-121.2	-34.1254	-87.8028	28.369	46.6944	27.9999	2.39	0	1.5	28.1962	-71.9689	16.9036	19.634	24.9981	4694.64	107.056	31.5961	1156.48	0.861864	0.00160583
ERCOT_HOUSTON_2022_15	-61.9691	37.2591	-124.63	54.9712	36.9912	-47.0231	7.05	0	1.5	61.9753	-28.7943	30.7843	46.5179	68.535	4835.43	146.369	20.3951	525.174	0.789439	0.00336158
ERCOT_NORTH_2019_15	-122.15	-37.5806	-87.9437	30.7468	46.2881	31.8474	2.39	0	1.5	27.5317	-10.4186	16.1815	19.1182	24.5337	4696.89	106.893	31.9975	1178.31	0.867546	0.00347416
ERCOT_NORTH_2022_15	-91.3785	3.21574	-154.42	27.5718	1.57844	-40.297	7.05	0	1.5	55.0602	-464.73	28.1067	44.2324	64.2469	5073.44	130.888	25.9057	819.627	0.817022	0.00478209
ERCOT_SOUTH_2019_15	-124.387	-37.6088	-90.2747	25.7806	43.896	29.646	2.39	0	1.5	27.5674	-50.289	16.8211	19.5852	24.8401	4694.81	105.741	32.5313	1210.85	0.872668	0.00149098
ERCOT_SOUTH_2022_15	-97.146	-3.88626	-159.095	22.1239	-5.58318	-38.0316	7.05	0	1.5	53.5081	-31.1793	28.1462	43.3772	63.0541	4680.66	114.065	25.2363	817.195	0.777704	0.00380378
ERCOT_WEST_2019_15	-121.286	-41.0073	-86.5641	40.1325	49.0275	40.8176	2.39	0	1.5	26.2011	-24.6412	14.5192	18.7915	24.5414	4697.2	107.584	31.6666	1160.65	0.862612	0.0051146
ERCOT_WEST_2022_15	-90.4182	-2.50259	-156.305	51.2289	11.1528	-14.5411	7.05	0	1.5	50.3809	-47.6123	22.8137	42.129	64.0505	5143.3	132.176	25.5024	807.542	0.803622	0.0337839
HighSolarCapRes_2030_15	-169.923	-95.7993	-146.227	-17.6136	-10.8861	44.1575	2.94	0	1.5	19.9601	-266.216	17.684	19.618	22.211	123.821	8.8207	-4.11651	250.057	0.0709152	0.058774
HighSolarTaxCapRes_2030_15	-79.2896	16.0839	-110.525	56.3662	40.9732	-29.3432	2.94	60	1.5	38.285	-1.95096	33.0251	39.912	46.684	205.299	25.2377	1.6091	9.19151	0.294376	0.0641126
HighSolarTax_2030_15	-38.9671	56.6677	-70.6147	96.5989	84.8033	-35.0925	2.94	60	1.5	45.4338	-6.02e-07	34.1537	40.1	47.731	1800	85.8702	13.8727	229.218	0.833057	0.0653255
HighSolar_2030_15	-117.857	-33.569	-102.218	29.0977	41.0116	23.6107	2.94	0	1.5	30.1282	-111.287	18.772	22.773	27.4103	1800	91.8303	14.2466	224.056	0.898297	0.0461758
HighWindCapRes_2030_15	-171.19	-95.5684	-147.511	-21.2412	-12.3233	42.203	2.94	0	1.5	20.1099	-330.008	17.744	19.981	23.246	111.651	8.71278	-16.8003	641.208	0.439685	0.0523287
HighWindTaxCapRes_2030_15	-82.854	12.6271	-115.68	53.8792	36.3096	-29.7043	2.94	60	1.5	37.4891	-3.8e-06	36.589	40.1	46.577	202.88	23.9098	1.27489	8.24416	0.233463	0.0877206
HighWindTax_2030_15	-37.9644	56.4357	-70.0205	100.681	86.5634	-31.7719	2.94	60	1.5	45.0606	-1.61e-07	36.589	43.4	48.711	1800	89.5046	15.129	263.435	0.862821	0.0913238
HighWind_2030_15	-121.134	-33.2032	-108.639	21.3779	34.6989	17.8555	2.94	0	1.5	30.2498	-113.282	19.025	24.1294	30.1	1349.59	80.5222	12.4831	162.055	0.950142	0.0361872
ISO_NE_2019_15	-146.038	-71.525	-190.692	-15.2963	-31.332	2.48515	4.5	0	1.5	30.6752	-56.16	19.0475	24.55	35.94	261.35	20.5617	2.80591	13.0445	0.552997	0.00176363
ISO_NE_2022_15	-52.3806	61.7987	-114.881	62.4231	51.3459	-65.4373	10.76	0	1.5	84.9154	-150.91	49.545	65.87	98.705	2254.35	64.9244	6.74101	157.497	0.289357	0.00223866
MiNg_$100_CAISO_2035_15	51.3644	129.691	39.9068	213.872	199.684	3.52566	2.26	100	1.5	52.9726	0	1.17	73.585	91.23	178.28	43.7191	-0.199732	-1.56826	0.725793	0.156735
MiNg_$100_ERCOT_2035_15	-56.5216	16.2917	-63.1144	121.159	93.3893	32.6396	2.64	100	1.5	33.6606	0	0	30.385	70.13	186.42	35.2975	0.482471	-0.945429	0.599717	0.07461
MiNg_$100_MISO-W_2035_15	-27.5124	42.9089	-18.0656	147.82	126.469	36.5875	1.69	100	1.5	35.1235	0	0	42.12	69.24	145.07	34.4469	0.142891	-1.71473	0.793295	0.100222
MiNg_$100_NYISO_2035_15	-8.99006	56.0444	22.7107	178.964	160.985	46.5177	1.12	100	1.5	35.2188	0	0	1.41	74.6625	182.14	40.0583	0.487904	-1.19525	0.685603	0.114546
MiNg_$100_PJM-W_2035_15	31.7013	111.859	26.2419	172.215	169.798	-9.27761	1.42	100	1.5	48.0117	0	8.06	63.575	76.9025	172.29	33.4736	-0.325041	-1.42697	0.702421	0.116823
MiNg_$150_CAISO_2035_15	31.02	100.405	37.0091	224.443	199.107	47.3235	2.26	150	1.5	45.3465	0	0	1.53	105.405	203.01	53.7364	0.44352	-1.6434	0.881469	0.116924
MiNg_$150_ERCOT_2035_15	-23.7152	41.9412	-23.7999	174.309	140.063	57.7459	2.64	150	1.5	36.1843	0	0	0.18	92.95	204.49	46.6016	0.660465	-1.31376	0.851208	0.095942
MiNg_$150_MISO-W_2035_15	-53.4896	8.90302	-30.6389	154.432	120.197	78.4135	2.01	150	1.5	28.1323	0	0	0.25	70.01	162.06	40.3893	0.919726	-0.924047	0.888739	0.0613147
MiNg_$150_NYISO_2035_15	-8.63188	50.801	37.6588	201.261	179.12	73.7623	1.14	150	1.5	33.6724	0	0	0.27	92.62	229.17	48.6042	0.9018	-0.822167	0.832197	0.0861544
MiNg_$150_PJM-W_2035_15	52.3102	126.339	61.2738	214.388	209.977	18.353	1.43	150	1.5	49.8141	0	0.15	47.84	98.48	181.06	45.7614	0.106801	-1.75696	0.812981	0.109773
MISO_INDIANA_2019_15	-151.698	-55.7624	-130.5	-19.5518	4.95651	12.0698	2.73	0	1.5	26.4054	2.26	20.95	23.33	26.67	936.4	21.6542	19.4117	575.727	0.652834	0.00205479
MISO_INDIANA_2022_15	-70.486	49.3431	-135.92	47.8305	38.4713	-65.9992	8.04	0	1.5	71.4631	-4.43	44.3475	58.255	81.5925	2411.71	70.2745	14.6369	366.39	0.582687	0.0024691
MISO_LOUISIANA_2019_15	-157.451	-64.4088	-133.659	-21.8446	1.05409	18.5672	2.73	0	1.5	24.8589	-31.26	20.1	22.67	25.8225	968.31	18.6434	23.6336	909.84	0.612975	0.00234946
MISO_LOUISIANA_2022_15	-106.222	1.79451	-168.669	-0.963468	-13.9472	-63.6182	8.04	0	1.5	62.4765	-3.03	40.29	52.905	71.82	2009.43	60.1612	16.3725	397.407	0.671959	0.00181516
MISO_MINNESOTA_2019_15	-165.037	-102.055	-174.504	-19.6702	-30.5186	35.6111	3.73	0	1.5	21.9714	-38.56	17.17	20.185	23.66	661.22	16.9596	19.5937	593.609	0.645171	0.00192215
MISO_MINNESOTA_2022_15	-135.673	-63.367	-203.721	-24.4553	-73.7393	-28.6543	8.04	0	1.5	44.0975	-62.28	23.52	36.915	55.6825	1781.78	49.0906	14.5568	395.169	0.5347	0.00196058
NETL_ERCOT_GEN_0_15	-167.036	-76.3719	-208.001	-59.8926	-55.4806	-22.4298	4.42	0	1.5	31.1397	0.126198	27.8705	30.1394	34.3657	193.137	8.6573	1.34638	27.2128	0.0930944	0.0100272
NETL_ERCOT_GEN_100_15	-10.2261	110.845	-64.676	109.2	110.171	-63.241	4.42	100	1.5	64.341	0.126314	52.6912	67.5342	75.2203	1167.41	27.1999	11.4191	386.907	0.336991	0.0222389
NETL_ERCOT_GEN_250_15	256.862	377.951	191.611	371.306	396.995	-64.1387	4.42	250	1.5	111.265	0.126314	80.8868	125.269	140.145	1289.15	56.1503	4.56794	90.9332	0.232781	0.0387437
NETL_ERCOT_GEN_25_15	-139.818	-23.6707	-186.916	-21.3335	-28	-55.5948	4.42	25	1.5	40.702	0.126314	34.7532	40.6694	45.8509	345.554	11.9194	4.1028	88.4141	0.195077	0.0125112
NETL_ERCOT_GEN_50_15	-98.8082	20.3876	-148.896	20.9267	15.5465	-60.2027	4.42	50	1.5	48.4546	0.126314	41.4196	50.3226	54.4781	841.245	17.649	12.8409	513.117	0.321417	0.0233085
NYISO_2019_15	-162.099	-90.7837	-146.55	-1.26588	-7.1064	46.8558	3.05	0	1.5	20.0901	-186.74	14.07	19.18	24.56	356.71	14.8361	3.19974	76.6679	0.141063	0.00197746
NYISO_2022_15	-87.5713	1.92234	-152.988	48.9236	9.86081	-22.7714	7.57	0	1.5	53.6445	-410.7	24.7	43.98	66.5375	2829.46	73.7528	15.1126	457.642	0.497978	0.0041326
PJM_WEST_2019_15	-143.545	-46.9634	-116.942	-10.1034	16.1856	13.3191	2.43	0	1.5	26.38	-52.9956	19.6223	23.1215	27.5677	746.585	22.9533	17.2221	426.54	0.692835	0.00274863
PJM_WEST_2022_15	-34.9044	91.1922	-96.3052	89.2139	85.7083	-65.5595	7.04	0	1.5	74.2523	-20.2954	44.4271	58.1489	81.3789	3794.43	118.222	19.7849	478.581	0.814902	0.00247495
SPP_NORTH_2019_15	-147.454	-79.6	-119.621	27.5353	18.9385	58.4111	2.75	0	1.5	20.1862	-46.4777	12.2819	16.905	21.6298	1130.72	31.469	14.1731	356.423	0.561665	0.00242402
SPP_NORTH_2022_15	-128.564	-64.9629	-202.452	24.9686	-51.8721	23.3891	8.21	0	1.5	35.7142	-102.798	9.72215	25.5635	52.3684	1161.63	50.0989	5.22841	66.2783	0.409015	0.00176584
SPP_SOUTH_2019_15	-142.08	-72.1162	-118.81	30.7851	23.0831	54.1258	2.83	0	1.5	21.4836	-43.7243	12.8588	18.4743	23.2245	1210.58	35.3158	13.0933	308.231	0.554039	0.00162879
SPP_SOUTH_2022_15	-78.1504	2.89315	-153.209	67.8666	19.0143	-15.0221	7.61	0	1.5	52.4427	-38.083	19.2189	40.4408	69.9561	1356.88	60.5277	4.11552	45.5524	0.369439	0.0017095
WinterNYCapRes_2030_15	-165.958	-84.3387	-144.761	-23.1622	-9.38085	31.2318	2.94	0	1.5	22.3565	1.06e-08	19.025	20.525	23.6601	135.512	9.70417	6.37768	56.9343	0.69533	0.0300593
WinterNYTaxCapRes_2030_15	-71.6226	30.9754	-111.073	50.7966	39.8359	-50.0241	2.94	60	1.5	41.8251	7.11e-08	37.718	43.683	47.4337	223.234	21.0337	1.76945	10.4959	0.306065	0.0453158
WinterNYTax_2030_15	-39.061	65.1672	-80.6688	80.7503	73.4201	-57.1085	2.94	60	1.5	48.004	1.36e-08	44.036	46.224	51.965	1800	44.4711	22.4425	734.263	0.684513	0.0355123
WinterNY_2030_15	-142.263	-46.9502	-127.715	-15.1306	10.7022	8.34232	2.94	0	1.5	29.0879	2.6e-07	21.548	23.726	28.2427	4257.43	81.723	31.5358	1215.07	0.817279	0.0356353
BaseCaseCapRes_2030_20	-171.19	-95.5684	-69.1368	56.6988	66.0482	120.665	2.94	0	2	20.1099	-330.008	17.744	19.981	23.246	111.651	8.71278	-16.8003	641.208	0.439685	0.0523286
BaseCaseTaxCapRes_2030_20	-78.1419	25.1862	-61.8194	62.7112	88.1987	8.05005	2.94	60	2	40.8521	-1.44e-06	37.342	40.1	45.541	209.1	23.2445	2.21713	13.8002	0.352095	0.060627
BaseCaseTax_2030_20	-38.9505	64.2211	-28.9322	102.604	124.928	-3.045	2.94	60	2	47.6871	-1.02e-07	37.342	43.4	47.28	1800	82.4753	15.4157	277.577	0.850543	0.0589257
BaseCase_2030_20	-121.134	-33.2032	-32.8427	82.3781	110.457	92.5381	2.94	0	2	30.2498	-113.282	19.025	24.1294	30.1	1349.59	80.5222	12.4831	162.055	0.950142	0.0361871
CAISO_NP15_2019_20	-124.37	-30.2633	-88.6897	48.0462	63.8068	46.7949	3.87	0	2	35.5941	-43.3701	22.9445	30.8378	41.7378	1013.67	37.846	13.8163	281.649	0.674126	0.00525771
CAISO_NP15_2022_20	36.598	170.806	-19.8455	185.961	189.263	-51.5807	7.47	0	2	89.6334	-16.3892	51.3034	69.9768	91.9737	1971.89	106.444	9.23867	129.129	0.653545	0.00420326
CAISO_SP15_2019_20	-121.715	-28.6865	-86.9145	52.3345	65.9588	46.8091	3.87	0	2	35.7629	-36.4988	21.9076	30.8134	42.2941	980.315	39.3494	13.0501	246.636	0.68622	0.00572128
CAISO_SP15_2022_20	23.55	147.883	-34.0297	179.238	175.069	-38.3447	7.47	0	2	84.2986	-27.4744	46.0654	65.9697	90.0033	1994.73	104.727	8.68144	119.572	0.623036	0.00408991
CAISO_ZP26_2019_20	-123.959	-31.0274	-88.0628	50.619	64.6259	48.6424	3.87	0	2	35.3162	-40.6231	21.9893	30.6805	41.6525	1065.91	38.8525	14.0379	289.042	0.678195	0.00520961
CAISO_ZP26_2022_20	10.3654	132.761	-47.2325	168.236	161.301	-35.2107	7.47	0	2	81.3012	-35.0853	45.0083	65.3063	86.9177	1976.53	101.724	9.08334	129.987	0.627931	0.00353733
ERCOT_HOUSTON_2019_20	-121.2	-34.1254	-13.2645	94.8707	121.161	102.546	2.39	0	2	28.1962	-71.9689	16.9036	19.634	24.9981	4694.64	107.056	31.5961	1156.48	0.861864	0.00160583
ERCOT_HOUSTON_2022_20	-61.9691	37.2591	-120.151	84.879	73.1722	-12.7328	7.05	0	2	61.9753	-28.7943	30.7843	46.5179	68.535	4835.43	146.369	20.3951	525.174	0.789439	0.00336158
ERCOT_NORTH_2019_20	-122.15	-37.5806	-13.3165	97.6455	120.852	106.474	2.39	0	2	27.5317	-10.4186	16.1815	19.1182	24.5337	4696.89	106.893	31.9975	1178.31	0.867546	0.00347416
ERCOT_NORTH_2022_20	-91.3785	3.21568	-154.612	60.1183	41.7425	-2.49255	7.05	0	2	55.0602	-464.73	28.1067	44.2324	64.2469	5073.44	130.888	25.9057	819.627	0.817022	0.00478209
ERCOT_SOUTH_2019_20	-124.387	-37.6088	-15.2795	92.8356	118.829	104.559	2.39	0	2	27.5674	-50.289	16.8211	19.5852	24.8401	4694.81	105.741	32.5313	1210.85	0.872668	0.00149098
ERCOT_SOUTH_2022_20	-97.146	-3.88627	-154.991	55.6775	35.8565	0.458622	7.05	0	2	53.5081	-31.1793	28.1462	43.3772	63.0541	4680.66	114.065	25.2363	817.195	0.777704	0.00380378
ERCOT_WEST_2019_20	-121.286	-41.0073	-11.9796	106.771	123.549	115.412	2.39	0	2	26.2011	-24.6412	14.5192	18.7915	24.5414	4697.2	107.584	31.6666	1160.65	0.862612	0.0051146
ERCOT_WEST_2022_20	-90.4182	-2.50259	-148.296	86.8557	52.9939	26.8317	7.05	0	2	50.3809	-47.6123	22.8137	42.129	64.0505	5143.3	132.176	25.5024	807.542	0.803622	0.0337839
HighSolarCapRes_2030_20	-169.923	-95.7993	-68.2278	60.0507	67.1045	122.314	2.94	0	2	19.9601	-266.216	17.684	19.618	22.211	123.821	8.8207	-4.11651	250.057	0.0709152	0.058774
HighSolarTaxCapRes_2030_20	-82.4358	14.5432	-58.3721	75.4587	92.3877	26.1879	2.94	60	2	38.285	-1.95096	33.0251	39.912	46.684	205.299	25.2377	1.6091	9.19151	0.294376	0.0641126
HighSolarTax_2030_20	-42.1164	55.1246	-22.1152	115.269	132.505	16.5032	2.94	60	2	45.4338	-6.02e-07	34.1537	40.1	47.731	1800	85.8702	13.8727	229.218	0.833057	0.0653255
HighSolar_2030_20	-117.857	-33.569	-26.893	94.4766	116.313	97.8281	2.94	0	2	30.1282	-111.287	18.772	22.773	27.4103	1800	91.8303	14.2466	224.056	0.898297	0.0461758
HighWindCapRes_2030_20	-171.19	-95.5684	-69.1367	56.6988	66.0482	120.665	2.94	0	2	20.1099	-330.008	17.744	19.981	23.246	111.651	8.71278	-16.8003	641.208	0.439685	0.0523287
HighWindTaxCapRes_2030_20	-86.049	11.0721	-64.6256	71.4402	86.247	25.5106	2.94	60	2	37.4891	-3.8e-06	36.589	40.1	46.577	202.88	23.9098	1.27489	8.24416	0.233463	0.0877206
HighWindTax_2030_20	-41.0992	54.898	-25.8266	119.258	129.695	17.0043	2.94	60	2	45.0606	-1.61e-07	36.589	43.4	48.711	1800	89.5046	15.129	263.435	0.862821	0.0913238
HighWind_2030_20	-121.134	-33.2032	-32.8427	82.3781	110.457	92.5381	2.94	0	2	30.2498	-113.282	19.025	24.1294	30.1	1349.59	80.5222	12.4831	162.055	0.950142	0.0361872
ISO_NE_2019_20	-146.038	-71.525	-121.328	40.9285	34.7289	69.3754	4.5	0	2	30.6752	-56.16	19.0475	24.55	35.94	261.35	20.5617	2.80591	13.0445	0.552997	0.00176363
ISO_NE_2022_20	-52.3806	61.7987	-114.845	71.3414	54.4692	-54.0193	10.76	0	2	84.9154	-150.91	49.545	65.87	98.705	2254.35	64.9244	6.74101	157.497	0.289357	0.00223866
MiNg_$100_CAISO_2035_20	47.3914	127.477	71.2184	244.821	230.971	36.921	2.26	100	2	52.9726	0	1.17	73.585	91.23	178.28	43.7191	-0.199732	-1.56826	0.725793	0.156735
MiNg_$100_ERCOT_2035_20	-59.9839	14.2258	-14.5981	160.319	141.81	83.9091	2.64	100	2	33.6606	0	0	30.385	70.13	186.42	35.2975	0.482471	-0.945429	0.599717	0.07461
MiNg_$100_MISO-W_2035_20	-30.8846	40.8948	22.1118	185.964	166.776	77.9203	1.69	100	2	35.1235	0	0	42.12	69.24	145.07	34.4469	0.142891	-1.71473	0.793295	0.100222
MiNg_$100_NYISO_2035_20	-11.9149	54.1034	66.5987	222.534	204.855	92.887	1.12	100	2	35.2188	0	0	1.41	74.6625	182.14	40.0583	0.487904	-1.19525	0.685603	0.114546
MiNg_$100_PJM-W_2035_20	27.2623	109.217	57.5262	199.782	200.961	22.4808	1.42	100	2	48.0117	0	8.06	63.575	76.9025	172.29	33.4736	-0.325041	-1.42697	0.702421	0.116823
MiNg_$150_CAISO_2035_20	26.9236	98.1376	83.0681	270.327	245.165	94.8751	2.26	150	2	45.3465	0	0	1.53	105.405	203.01	53.7364	0.44352	-1.6434	0.881469	0.116924
MiNg_$150_ERCOT_2035_20	-27.6635	39.6609	26.7827	222.35	190.617	107.897	2.64	150	2	36.1843	0	0	0.18	92.95	204.49	46.6016	0.660465	-1.31376	0.851208	0.095942
MiNg_$150_MISO-W_2035_20	-56.6688	6.96282	21.4097	207.687	173.597	133.008	2.01	150	2	28.1323	0	0	0.25	70.01	162.06	40.3893	0.919726	-0.924047	0.888739	0.0613147
MiNg_$150_NYISO_2035_20	-11.8701	48.6195	90.5166	254.11	231.978	127.94	1.14	150	2	33.6724	0	0	0.27	92.62	229.17	48.6042	0.9018	-0.822167	0.832197	0.0861544
MiNg_$150_PJM-W_2035_20	46.9544	122.866	100.394	251.921	249.063	57.6136	1.43	150	2	49.8141	0	0.15	47.84	98.48	181.06	45.7614	0.106801	-1.75696	0.812981	0.109773
MISO_INDIANA_2019_20	-151.698	-55.7624	-55.2848	46.928	80.0929	87.9186	2.73	0	2	26.4054	2.26	20.95	23.33	26.67	936.4	21.6542	19.4117	575.727	0.652834	0.00205479
MISO_INDIANA_2022_20	-70.486	49.3431	-135.531	60.4036	49.6893	-52.1627	8.04	0	2	71.4631	-4.43	44.3475	58.255	81.5925	2411.71	70.2745	14.6369	366.39	0.582687	0.0024691
MISO_LOUISIANA_2019_20	-157.451	-64.4088	-57.2368	47.2705	77.4211	95.4092	2.73	0	2	24.8589	-31.26	20.1	22.67	25.8225	968.31	18.6434	23.6336	909.84	0.612975	0.00234946
MISO_LOUISIANA_2022_20	-106.222	1.79451	-168.439	19.4453	9.28249	-40.9897	8.04	0	2	62.4765	-3.03	40.29	52.905	71.82	2009.43	60.1612	16.3725	397.407	0.671959	0.00181516
MISO_MINNESOTA_2019_20	-165.037	-102.055	-97.7705	53.3383	46.1754	112.694	3.73	0	2	21.9714	-38.56	17.17	20.185	23.66	661.22	16.9596	19.5937	593.609	0.645171	0.00192215
MISO_MINNESOTA_2022_20	-135.673	-63.367	-202.108	20.3373	-23.3127	21.4258	8.04	0	2	44.0975	-62.28	23.52	36.915	55.6825	1781.78	49.0906	14.5568	395.169	0.5347	0.00196058
NETL_ERCOT_GEN_0_20	-167.036	-76.3719	-134.391	-4.89271	17.8145	51.5771	4.42	0	2	31.1397	0.126198	27.8705	30.1394	34.3657	193.137	8.6573	1.34638	27.2128	0.0930944	0.0100272
NETL_ERCOT_GEN_100_20	-16.5492	107.401	-51.8942	118.385	122.579	-50.6661	4.42	100	2	64.341	0.126314	52.6912	67.5342	75.2203	1167.41	27.1999	11.4191	386.907	0.336991	0.0222389
NETL_ERCOT_GEN_250_20	241.142	369.411	203.556	380.645	408.68	-56.1254	4.42	250	2	111.265	0.126314	80.8868	125.269	140.145	1289.15	56.1503	4.56794	90.9332	0.232781	0.0387437
NETL_ERCOT_GEN_25_20	-141.002	-24.5141	-134.65	-3.65665	22.7812	-3.00608	4.42	25	2	40.702	0.126314	34.7532	40.6694	45.8509	345.554	11.9194	4.1028	88.4141	0.195077	0.0125112
NETL_ERCOT_GEN_50_20	-101.734	18.6648	-122.184	33.83	40.9189	-34.2072	4.42	50	2	48.4546	0.126314	41.4196	50.3226	54.4781	841.245	17.649	12.8409	513.117	0.321417	0.0233085
NYISO_2019_20	-162.099	-90.7837	-70.6671	68.445	69.0153	123.501	3.05	0	2	20.0901	-186.74	14.07	19.18	24.56	356.71	14.8361	3.19974	76.6679	0.141063	0.00197746
NYISO_2022_20	-87.3063	1.92233	-148.736	82.3339	48.0287	16.3227	7.57	0	2	53.6445	-410.7	24.7	43.98	66.5375	2829.46	73.7528	15.1126	457.642	0.497978	0.0041326
PJM_WEST_2019_20	-143.545	-46.9634	-42.2276	52.9131	90.8014	88.7423	2.43	0	2	26.38	-52.9956	19.6223	23.1215	27.5677	746.585	22.9533	17.2221	426.54	0.692835	0.00274863
PJM_WEST_2022_20	-34.9044	91.1922	-91.861	100.605	104.425	-51.3407	7.04	0	2	74.2523	-20.2954	44.4271	58.1489	81.3789	3794.43	118.222	19.7849	478.581	0.814902	0.00247495
SPP_NORTH_2019_20	-147.454	-79.6	-45.099	98.2915	93.4078	133.735	2.75	0	2	20.1862	-46.4777	12.2819	16.905	21.6298	1130.72	31.469	14.1731	356.423	0.561665	0.00242402
SPP_NORTH_2022_20	-128.564	-64.9629	-198.677	76.4934	1.14977	79.6775	8.21	0	2	35.7142	-102.798	9.72215	25.5635	52.3684	1161.63	50.0989	5.22841	66.2783	0.409015	0.00176584
SPP_SOUTH_2019_20	-142.08	-72.1163	-45.3169	99.7109	96.512	128.615	2.83	0	2	21.4836	-43.7243	12.8588	18.4743	23.2245	1210.58	35.3158	13.0933	308.231	0.554039	0.00162879
SPP_SOUTH_2022_20	-78.1504	2.89312	-145.193	106.056	63.3112	26.1855	7.61	0	2	52.4427	-38.083	19.2189	40.4408	69.9561	1356.88	60.5277	4.11552	45.5524	0.369439	0.0017095
WinterNYCapRes_2030_20	-165.958	-84.3387	-67.3692	51.5147	67.9988	108.9	2.94	0	2	22.3565	1.06e-08	19.025	20.525	23.6601	135.512	9.70417	6.37768	56.9343	0.69533	0.0300593
WinterNYTaxCapRes_2030_20	-75.1364	29.34	-66.93	62.253	82.6294	-1.90935	2.94	60	2	41.8251	7.11e-08	37.718	43.683	47.4337	223.234	21.0337	1.76945	10.4959	0.306065	0.0453158
WinterNYTax_2030_20	-42.653	63.5093	-50.5614	90.3676	102.034	-23.804	2.94	60	2	48.004	1.36e-08	44.036	46.224	51.965	1800	44.4711	22.4425	734.263	0.684513	0.0355123
WinterNY_2030_20	-142.263	-46.9502	-50.4606	50.8014	87.9314	85.3412	2.94	0	2	29.0879	2.6e-07	21.548	23.726	28.2427	4257.43	81.723	31.5358	1215.07	0.817279	0.0356353
BaseCaseCapRes_2030_25	-171.19	-95.5684	9.44381	134.903	144.623	199.286	2.94	0	2.5	20.1099	-330.008	17.744	19.981	23.246	111.651	8.71278	-16.8003	641.208	0.439685	0.0523286
BaseCaseTaxCapRes_2030_25	-74.6752	26.8196	8.56314	85.9271	158.257	79.6558	2.94	60	2.5	40.8521	-1.44e-06	37.342	40.1	45.541	209.1	23.2445	2.21713	13.8002	0.352095	0.060627
BaseCaseTax_2030_25	-35.5021	65.8521	38.3053	123.25	191.805	64.9234	2.94	60	2.5	47.6871	-1.02e-07	37.342	43.4	47.28	1800	82.4753	15.4157	277.577	0.850543	0.0589257
BaseCase_2030_25	-121.134	-33.2032	43.8496	156.179	187.129	168.657	2.94	0	2.5	30.2498	-113.282	19.025	24.1294	30.1	1349.59	80.5222	12.4831	162.055	0.950142	0.0361871
CAISO_NP15_2019_25	-124.37	-30.2633	-17.0822	103.552	135.208	118.295	3.87	0	2.5	35.5941	-43.3701	22.9445	30.8378	41.7378	1013.67	37.846	13.8163	281.649	0.674126	0.00525771
CAISO_NP15_2022_25	36.598	170.806	1.93449	201.443	213.508	-26.9175	7.47	0	2.5	89.6334	-16.3892	51.3034	69.9768	91.9737	1971.89	106.444	9.23867	129.129	0.653545	0.00420326
CAISO_SP15_2019_25	-121.715	-28.6865	-15.9028	107.122	136.748	118.054	3.87	0	2.5	35.7629	-36.4988	21.9076	30.8134	42.2941	980.315	39.3494	13.0501	246.636	0.68622	0.00572128
CAISO_SP15_2022_25	23.55	147.883	-7.77249	199.52	204.374	-7.79282	7.47	0	2.5	84.2986	-27.4744	46.0654	65.9697	90.0033	1994.73	104.727	8.68144	119.572	0.623036	0.00408991
CAISO_ZP26_2019_25	-123.959	-31.0274	-16.5889	106.228	135.893	120.251	3.87	0	2.5	35.3162	-40.6231	21.9893	30.6805	41.6525	1065.91	38.8525	14.0379	289.042	0.678195	0.00520961
CAISO_ZP26_2022_25	10.3654	132.761	-21.0534	189.49	191.29	-3.35354	7.47	0	2.5	81.3012	-35.0853	45.0083	65.3063	86.9177	1976.53	101.724	9.08334	129.987	0.627931	0.00353733
ERCOT_HOUSTON_2019_25	-121.2	-34.1254	62.9201	166.95	197.314	178.618	2.39	0	2.5	28.1962	-71.9689	16.9036	19.634	24.9981	4694.64	107.056	31.5961	1156.48	0.861864	0.00160583
ERCOT_HOUSTON_2022_25	-61.9691	37.2591	-72.2831	123.464	123.387	35.4271	7.05	0	2.5	61.9753	-28.7943	30.7843	46.5179	68.535	4835.43	146.369	20.3951	525.174	0.789439	0.00336158
ERCOT_NORTH_2019_25	-122.15	-37.5806	62.8594	169.974	196.997	182.518	2.39	0	2.5	27.5317	-10.4186	16.1815	19.1182	24.5337	4696.89	106.893	31.9975	1178.31	0.867546	0.00347416
ERCOT_NORTH_2022_25	-91.3785	3.21574	-99.2852	101.345	94.6805	50.3698	7.05	0	2.5	55.0602	-464.73	28.1067	44.2324	64.2469	5073.44	130.888	25.9057	819.627	0.817022	0.00478209
ERCOT_SOUTH_2019_25	-124.387	-37.6088	61.1239	165.564	195.203	180.828	2.39	0	2.5	27.5674	-50.289	16.8211	19.5852	24.8401	4694.81	105.741	32.5313	1210.85	0.872668	0.00149098
ERCOT_SOUTH_2022_25	-97.146	-3.88626	-104.495	97.9882	89.3737	53.4188	7.05	0	2.5	53.5081	-31.1793	28.1462	43.3772	63.0541	4680.66	114.065	25.2363	817.195	0.777704	0.00380378
ERCOT_WEST_2019_25	-121.286	-41.0073	64.1439	178.981	199.639	191.429	2.39	0	2.5	26.2011	-24.6412	14.5192	18.7915	24.5414	4697.2	107.584	31.6666	1160.65	0.862612	0.0051146
ERCOT_WEST_2022_25	-90.4182	-2.50259	-95.6997	129.745	106.381	80.8253	7.05	0	2.5	50.3809	-47.6123	22.8137	42.129	64.0505	5143.3	132.176	25.5024	807.542	0.803622	0.0337839
HighSolarCapRes_2030_25	-169.923	-95.7993	10.0888	137.869	145.413	200.722	2.94	0	2.5	19.9601	-266.216	17.684	19.618	22.211	123.821	8.8207	-4.11651	250.057	0.0709152	0.058774
HighSolarTaxCapRes_2030_25	-79.2896	16.0839	8.86627	105.357	159.25	95.1977	2.94	60	2.5	38.285	-1.95096	33.0251	39.912	46.684	205.299	25.2377	1.6091	9.19151	0.294376	0.0641126
HighSolarTax_2030_25	-38.9671	56.6677	42.8952	143.138	197.147	82.3442	2.94	60	2.5	45.4338	-6.02e-07	34.1537	40.1	47.731	1800	85.8702	13.8727	229.218	0.833057	0.0653255
HighSolar_2030_25	-117.857	-33.569	49.1969	168.717	192.375	173.063	2.94	0	2.5	30.1282	-111.287	18.772	22.773	27.4103	1800	91.8303	14.2466	224.056	0.898297	0.0461758
HighWindCapRes_2030_25	-171.19	-95.5684	9.44381	134.903	144.623	199.286	2.94	0	2.5	20.1099	-330.008	17.744	19.981	23.246	111.651	8.71278	-16.8003	641.208	0.439685	0.0523287
HighWindTaxCapRes_2030_25	-82.854	12.6271	7.61916	97.5424	158.272	98.731	2.94	60	2.5	37.4891	-3.8e-06	36.589	40.1	46.577	202.88	23.9098	1.27489	8.24416	0.233463	0.0877206
HighWindTax_2030_25	-37.9644	56.4357	41.4499	143.556	196.651	85.3572	2.94	60	2.5	45.0606	-1.61e-07	36.589	43.4	48.711	1800	89.5046	15.129	263.435	0.862821	0.0913238
HighWind_2030_25	-121.134	-33.2032	43.8495	156.179	187.129	168.657	2.94	0	2.5	30.2498	-113.282	19.025	24.1294	30.1	1349.59	80.5222	12.4831	162.055	0.950142	0.0361872
ISO_NE_2019_25	-146.038	-71.525	-48.9853	104.579	106.926	142.045	4.5	0	2.5	30.6752	-56.16	19.0475	24.55	35.94	261.35	20.5617	2.80591	13.0445	0.552997	0.00176363
ISO_NE_2022_25	-52.3806	61.7987	-114.719	91.3176	79.9898	-27.9021	10.76	0	2.5	84.9154	-150.91	49.545	65.87	98.705	2254.35	64.9244	6.74101	157.497	0.289357	0.00223866
MiNg_$100_CAISO_2035_25	51.3644	129.691	104.009	275.84	263.664	72.329	2.26	100	2.5	52.9726	0	1.17	73.585	91.23	178.28	43.7191	-0.199732	-1.56826	0.725793	0.156735
MiNg_$100_ERCOT_2035_25	-56.5216	16.2917	37.6792	205.027	193.891	139.45	2.64	100	2.5	33.6606	0	0	30.385	70.13	186.42	35.2975	0.482471	-0.945429	0.599717	0.07461
MiNg_$100_MISO-W_2035_25	-27.5124	42.9089	70.1613	224.22	214.196	126.807	1.69	100	2.5	35.1235	0	0	42.12	69.24	145.07	34.4469	0.142891	-1.71473	0.793295	0.100222
MiNg_$100_NYISO_2035_25	-8.99006	56.0444	112.438	266.139	250.557	142.2	1.12	100	2.5	35.2188	0	0	1.41	74.6625	182.14	40.0583	0.487904	-1.19525	0.685603	0.114546
MiNg_$100_PJM-W_2035_25	31.7013	111.859	93.6758	228.391	236.892	61.4876	1.42	100	2.5	48.0117	0	8.06	63.575	76.9025	172.29	33.4736	-0.325041	-1.42697	0.702421	0.116823
MiNg_$150_CAISO_2035_25	31.02	100.405	129.152	316.288	291.246	143.344	2.26	150	2.5	45.3465	0	0	1.53	105.405	203.01	53.7364	0.44352	-1.6434	0.881469	0.116924
MiNg_$150_ERCOT_2035_25	-23.7152	41.9412	78.0528	272.236	241.86	162.022	2.64	150	2.5	36.1843	0	0	0.18	92.95	204.49	46.6016	0.660465	-1.31376	0.851208	0.095942
MiNg_$150_MISO-W_2035_25	-53.4896	8.90302	77.7722	260.942	228.477	189.327	2.01	150	2.5	28.1323	0	0	0.25	70.01	162.06	40.3893	0.919726	-0.924047	0.888739	0.0613147
MiNg_$150_NYISO_2035_25	-8.63188	50.801	143.47	306.96	284.922	182.931	1.14	150	2.5	33.6724	0	0	0.27	92.62	229.17	48.6042	0.9018	-0.822167	0.832197	0.0861544
MiNg_$150_PJM-W_2035_25	52.3102	126.339	141.436	290.122	290.006	99.3459	1.43	150	2.5	49.8141	0	0.15	47.84	98.48	181.06	45.7614	0.106801	-1.75696	0.812981	0.109773
MISO_INDIANA_2019_25	-151.698	-55.7624	21.7041	119.709	157.045	165.221	2.73	0	2.5	26.4054	2.26	20.95	23.33	26.67	936.4	21.6542	19.4117	575.727	0.652834	0.00205479
MISO_INDIANA_2022_25	-70.486	49.3431	-112.113	85.0837	92.4133	-18.6584	8.04	0	2.5	71.4631	-4.43	44.3475	58.255	81.5925	2411.71	70.2745	14.6369	366.39	0.582687	0.0024691
MISO_LOUISIANA_2019_25	-157.451	-64.4088	20.3817	121.927	155.016	173.235	2.73	0	2.5	24.8589	-31.26	20.1	22.67	25.8225	968.31	18.6434	23.6336	909.84	0.612975	0.00234946
MISO_LOUISIANA_2022_25	-106.222	1.79451	-146.593	51.2713	53.4095	-0.886581	8.04	0	2.5	62.4765	-3.03	40.29	52.905	71.82	2009.43	60.1612	16.3725	397.407	0.671959	0.00181516
MISO_MINNESOTA_2019_25	-165.037	-102.055	-20.2749	129.172	123.839	190.579	3.73	0	2.5	21.9714	-38.56	17.17	20.185	23.66	661.22	16.9596	19.5937	593.609	0.645171	0.00192215
MISO_MINNESOTA_2022_25	-135.673	-63.367	-169.415	72.4142	26.5791	83.1358	8.04	0	2.5	44.0975	-62.28	23.52	36.915	55.6825	1781.78	49.0906	14.5568	395.169	0.5347	0.00196058
NETL_ERCOT_GEN_0_25	-167.036	-76.3719	-56.2343	65.0501	95.9419	129.819	4.42	0	2.5	31.1397	0.126198	27.8705	30.1394	34.3657	193.137	8.6573	1.34638	27.2128	0.0930944	0.0100272
NETL_ERCOT_GEN_100_25	-10.2261	110.845	-25.5686	129.007	148.093	-27.0129	4.42	100	2.5	64.341	0.126314	52.6912	67.5342	75.2203	1167.41	27.1999	11.4191	386.907	0.336991	0.0222389
NETL_ERCOT_GEN_250_25	256.862	377.951	220.78	391.204	425.731	-42.2435	4.42	250	2.5	111.265	0.126314	80.8868	125.269	140.145	1289.15	56.1503	4.56794	90.9332	0.232781	0.0387437
NETL_ERCOT_GEN_25_25	-139.818	-23.6707	-61.3355	35.1741	95.7962	70.7123	4.42	25	2.5	40.702	0.126314	34.7532	40.6694	45.8509	345.554	11.9194	4.1028	88.4141	0.195077	0.0125112
NETL_ERCOT_GEN_50_25	-98.8082	20.3876	-61.2483	52.3194	100.824	27.025	4.42	50	2.5	48.4546	0.126314	41.4196	50.3226	54.4781	841.245	17.649	12.8409	513.117	0.321417	0.0233085
NYISO_2019_25	-162.099	-90.7837	7.24075	143.052	146.598	201.313	3.05	0	2.5	20.0901	-186.74	14.07	19.18	24.56	356.71	14.8361	3.19974	76.6679	0.141063	0.00197746
NYISO_2022_25	-87.5713	1.92234	-109.065	124.701	99.3868	68.1027	7.57	0	2.5	53.6445	-410.7	24.7	43.98	66.5375	2829.46	73.7528	15.1126	457.642	0.497978	0.0041326
PJM_WEST_2019_25	-143.545	-46.9634	34.6815	124.316	167.67	165.972	2.43	0	2.5	26.38	-52.9956	19.6223	23.1215	27.5677	746.585	22.9533	17.2221	426.54	0.692835	0.00274863
PJM_WEST_2022_25	-34.9044	91.1922	-55.1451	122.196	141.479	-18.7486	7.04	0	2.5	74.2523	-20.2954	44.4271	58.1489	81.3789	3794.43	118.222	19.7849	478.581	0.814902	0.00247495
SPP_NORTH_2019_25	-147.454	-79.6	30.8138	171.502	169.282	210.176	2.75	0	2.5	20.1862	-46.4777	12.2819	16.905	21.6298	1130.72	31.469	14.1731	356.423	0.561665	0.00242402
SPP_NORTH_2022_25	-128.564	-64.9629	-163.171	133.358	57.3852	143.248	8.21	0	2.5	35.7142	-102.798	9.72215	25.5635	52.3684	1161.63	50.0989	5.22841	66.2783	0.409015	0.00176584
SPP_SOUTH_2019_25	-142.08	-72.1162	29.8653	171.639	171.644	204.451	2.83	0	2.5	21.4836	-43.7243	12.8588	18.4743	23.2245	1210.58	35.3158	13.0933	308.231	0.554039	0.00162879
SPP_SOUTH_2022_25	-78.1504	2.89315	-99.2653	150.797	114.81	79.5168	7.61	0	2.5	52.4427	-38.083	19.2189	40.4408	69.9561	1356.88	60.5277	4.11552	45.5524	0.369439	0.0017095
WinterNYCapRes_2030_25	-165.958	-84.3387	10.3392	128.65	145.696	186.818	2.94	0	2.5	22.3565	1.06e-08	19.025	20.525	23.6601	135.512	9.70417	6.37768	56.9343	0.69533	0.0300593
WinterNYTaxCapRes_2030_25	-71.6226	30.9754	5.47226	81.6518	155.632	71.9989	2.94	60	2.5	41.8251	7.11e-08	37.718	43.683	47.4337	223.234	21.0337	1.76945	10.4959	0.306065	0.0453158
WinterNYTax_2030_25	-39.061	65.1672	15.6599	103.223	167.737	43.5517	2.94	60	2.5	48.004	1.36e-08	44.036	46.224	51.965	1800	44.4711	22.4425	734.263	0.684513	0.0355123
WinterNY_2030_25	-142.263	-46.9502	27.1569	127.288	165.541	162.948	2.94	0	2.5	29.0879	2.6e-07	21.548	23.726	28.2427	4257.43	81.723	31.5358	1215.07	0.817279	0.0356353
BaseCaseCapRes_2030_30	-171.19	-95.5684	88.2003	213.292	223.378	278.057	2.94	0	3	20.1099	-330.008	17.744	19.981	23.246	111.651	8.71278	-16.8003	641.208	0.439685	0.0523286
BaseCaseTaxCapRes_2030_30	-74.6752	26.8196	83.8271	138.257	233.468	155.504	2.94	60	3	40.8521	-1.44e-06	37.342	40.1	45.541	209.1	23.2445	2.21713	13.8002	0.352095	0.060627
BaseCaseTax_2030_30	-35.5021	65.8521	112.154	168.094	265.529	138.842	2.94	60	3	47.6871	-1.02e-07	37.342	43.4	47.28	1800	82.4753	15.4157	277.577	0.850543	0.0589257
BaseCase_2030_30	-121.134	-33.2032	120.967	232.136	264.233	245.556	2.94	0	3	30.2498	-113.282	19.025	24.1294	30.1	1349.59	80.5222	12.4831	162.055	0.950142	0.0361871
CAISO_NP15_2019_30	-124.37	-30.2633	57.9932	167.808	210.185	193.488	3.87	0	3	35.5941	-43.3701	22.9445	30.8378	41.7378	1013.67	37.846	13.8163	281.649	0.674126	0.00525771
CAISO_NP15_2022_30	36.598	170.806	41.2288	222.981	251.912	11.7911	7.47	0	3	89.6334	-16.3892	51.3034	69.9768	91.9737	1971.89	106.444	9.23867	129.129	0.653545	0.00420326
CAISO_SP15_2019_30	-121.715	-28.6865	59.0322	170.428	211.576	193.207	3.87	0	3	35.7629	-36.4988	21.9076	30.8134	42.2941	980.315	39.3494	13.0501	246.636	0.68622	0.00572128
CAISO_SP15_2022_30	23.55	147.883	35.7637	225.924	247.168	36.0514	7.47	0	3	84.2986	-27.4744	46.0654	65.9697	90.0033	1994.73	104.727	8.68144	119.572	0.623036	0.00408991
CAISO_ZP26_2019_30	-123.959	-31.0274	58.4504	170.374	210.829	195.409	3.87	0	3	35.3162	-40.6231	21.9893	30.6805	41.6525	1065.91	38.8525	14.0379	289.042	0.678195	0.00520961
CAISO_ZP26_2022_30	10.3654	132.761	24.1837	216.63	235.045	42.0024	7.47	0	3	81.3012	-35.0853	45.0083	65.3063	86.9177	1976.53	101.724	9.08334	129.987	0.627931	0.00353733
ERCOT_HOUSTON_2019_30	-121.2	-34.1254	139.839	241.312	274.206	255.492	2.39	0	3	28.1962	-71.9689	16.9036	19.634	24.9981	4694.64	107.056	31.5961	1156.48	0.861864	0.00160583
ERCOT_HOUSTON_2022_30	-61.9691	37.2591	-12.0282	170.019	183.109	95.4385	7.05	0	3	61.9753	-28.7943	30.7843	46.5179	68.535	4835.43	146.369	20.3951	525.174	0.789439	0.00336158
ERCOT_NORTH_2019_30	-122.15	-37.5806	139.682	244.431	273.794	259.32	2.39	0	3	27.5317	-10.4186	16.1815	19.1182	24.5337	4696.89	106.893	31.9975	1178.31	0.867546	0.00347416
ERCOT_NORTH_2022_30	-91.3785	3.21574	-36.4771	150.609	157.003	113.37	7.05	0	3	55.0602	-464.73	28.1067	44.2324	64.2469	5073.44	130.888	25.9057	819.627	0.817022	0.00478209
ERCOT_SOUTH_2019_30	-124.387	-37.6088	138.184	240.402	272.239	257.817	2.39	0	3	27.5674	-50.289	16.8211	19.5852	24.8401	4694.81	105.741	32.5313	1210.85	0.872668	0.00149098
ERCOT_SOUTH_2022_30	-97.146	-3.88626	-40.4503	147.901	152.888	117.364	7.05	0	3	53.5081	-31.1793	28.1462	43.3772	63.0541	4680.66	114.065	25.2363	817.195	0.777704	0.00380378
ERCOT_WEST_2019_30	-121.286	-41.0073	140.942	253.413	276.411	268.211	2.39	0	3	26.2011	-24.6412	14.5192	18.7915	24.5414	4697.2	107.584	31.6666	1160.65	0.862612	0.0051146
ERCOT_WEST_2022_30	-90.4182	-2.50259	-32.8458	179.705	168.771	143.896	7.05	0	3	50.3809	-47.6123	22.8137	42.129	64.0505	5143.3	132.176	25.5024	807.542	0.803622	0.0337839
HighSolarCapRes_2030_30	-169.923	-95.7993	88.5909	215.86	223.907	279.277	2.94	0	3	19.9601	-266.216	17.684	19.618	22.211	123.821	8.8207	-4.11651	250.057	0.0709152	0.058774
HighSolarTaxCapRes_2030_30	-79.2896	16.0839	83.9501	158.546	234.184	170.724	2.94	60	3	38.285	-1.95096	33.0251	39.912	46.684	205.299	25.2377	1.6091	9.19151	0.294376	0.0641126
HighSolarTax_2030_30	-38.9671	56.6677	116.165	192.161	270.214	155.285	2.94	60	3	45.4338	-6.02e-07	34.1537	40.1	47.731	1800	85.8702	13.8727	229.218	0.833057	0.0653255
HighSolar_2030_30	-117.857	-33.569	125.98	244.055	269.13	250.118	2.94	0	3	30.1282	-111.287	18.772	22.773	27.4103	1800	91.8303	14.2466	224.056	0.898297	0.0461758
HighWindCapRes_2030_30	-171.19	-95.5684	88.2003	213.292	223.378	278.057	2.94	0	3	20.1099	-330.008	17.744	19.981	23.246	111.651	8.71278	-16.8003	641.208	0.439685	0.0523287
HighWindTaxCapRes_2030_30	-82.854	12.6271	83.2631	149.159	233.831	174.862	2.94	60	3	37.4891	-3.8e-06	36.589	40.1	46.577	202.88	23.9098	1.27489	8.24416	0.233463	0.0877206
HighWindTax_2030_30	-37.9644	56.4357	114.817	187.289	269.817	158.871	2.94	60	3	45.0606	-1.61e-07	36.589	43.4	48.711	1800	89.5046	15.129	263.435	0.862821	0.0913238
HighWind_2030_30	-121.134	-33.2032	120.967	232.136	264.232	245.556	2.94	0	3	30.2498	-113.282	19.025	24.1294	30.1	1349.59	80.5222	12.4831	162.055	0.950142	0.0361872
ISO_NE_2019_30	-146.038	-71.525	26.0595	173.012	181.885	217.436	4.5	0	3	30.6752	-56.16	19.0475	24.55	35.94	261.35	20.5617	2.80591	13.0445	0.552997	0.00176363
ISO_NE_2022_30	-52.3806	61.7987	-110.536	125.53	122.247	13.549	10.76	0	3	84.9154	-150.91	49.545	65.87	98.705	2254.35	64.9244	6.74101	157.497	0.289357	0.00223866
MiNg_$100_CAISO_2035_30	51.3644	129.691	141.272	307.055	300.556	113.872	2.26	100	3	52.9726	0	1.17	73.585	91.23	178.28	43.7191	-0.199732	-1.56826	0.725793	0.156735
MiNg_$100_ERCOT_2035_30	-56.5216	16.2917	97.4018	253.523	253.082	202.016	2.64	100	3	33.6606	0	0	30.385	70.13	186.42	35.2975	0.482471	-0.945429	0.599717	0.07461
MiNg_$100_MISO-W_2035_30	-27.5124	42.9089	130.634	263.664	273.923	188.52	1.69	100	3	35.1235	0	0	42.12	69.24	145.07	34.4469	0.142891	-1.71473	0.793295	0.100222
MiNg_$100_NYISO_2035_30	-8.99006	56.0444	165.685	309.852	303.236	198.447	1.12	100	3	35.2188	0	0	1.41	74.6625	182.14	40.0583	0.487904	-1.19525	0.685603	0.114546
MiNg_$100_PJM-W_2035_30	31.7013	111.859	139.696	258.591	282.101	112.019	1.42	100	3	48.0117	0	8.06	63.575	76.9025	172.29	33.4736	-0.325041	-1.42697	0.702421	0.116823
MiNg_$150_CAISO_2035_30	31.02	100.405	175.55	362.35	337.606	192.826	2.26	150	3	45.3465	0	0	1.53	105.405	203.01	53.7364	0.44352	-1.6434	0.881469	0.116924
MiNg_$150_ERCOT_2035_30	-23.7152	41.9412	130.36	322.783	294.12	218.262	2.64	150	3	36.1843	0	0	0.18	92.95	204.49	46.6016	0.660465	-1.31376	0.851208	0.095942
MiNg_$150_MISO-W_2035_30	-53.4896	8.90302	136.861	314.283	287.351	249.91	2.01	150	3	28.1323	0	0	0.25	70.01	162.06	40.3893	0.919726	-0.924047	0.888739	0.0613147
MiNg_$150_NYISO_2035_30	-8.63188	50.801	196.947	359.817	338.334	238.922	1.14	150	3	33.6724	0	0	0.27	92.62	229.17	48.6042	0.9018	-0.822167	0.832197	0.0861544
MiNg_$150_PJM-W_2035_30	52.3102	126.339	185.285	328.957	333.725	145.012	1.43	150	3	49.8141	0	0.15	47.84	98.48	181.06	45.7614	0.106801	-1.75696	0.812981	0.109773
MISO_INDIANA_2019_30	-151.698	-55.7624	99.3765	194.894	234.698	243.091	2.73	0	3	26.4054	2.26	20.95	23.33	26.67	936.4	21.6542	19.4117	575.727	0.652834	0.00205479
MISO_INDIANA_2022_30	-70.486	49.3431	-61.4047	119.815	142.3	30.2253	8.04	0	3	71.4631	-4.43	44.3475	58.255	81.5925	2411.71	70.2745	14.6369	366.39	0.582687	0.0024691
MISO_LOUISIANA_2019_30	-157.451	-64.4088	98.4476	198.332	233.069	251.431	2.73	0	3	24.8589	-31.26	20.1	22.67	25.8225	968.31	18.6434	23.6336	909.84	0.612975	0.00234946
MISO_LOUISIANA_2022_30	-106.222	1.79451	-88.9791	93.2634	110.506	56.9072	8.04	0	3	62.4765	-3.03	40.29	52.905	71.82	2009.43	60.1612	16.3725	397.407	0.671959	0.00181516
MISO_MINNESOTA_2019_30	-165.037	-102.055	58.0628	206.16	201.971	268.837	3.73	0	3	21.9714	-38.56	17.17	20.185	23.66	661.22	16.9596	19.5937	593.609	0.645171	0.00192215
MISO_MINNESOTA_2022_30	-135.673	-63.367	-102.109	130.776	103.151	152.022	8.04	0	3	44.0975	-62.28	23.52	36.915	55.6825	1781.78	49.0906	14.5568	395.169	0.5347	0.00196058
NETL_ERCOT_GEN_0_30	-167.036	-76.3719	22.4652	141.132	174.63	208.529	4.42	0	3	31.1397	0.126198	27.8705	30.1394	34.3657	193.137	8.6573	1.34638	27.2128	0.0930944	0.0100272
NETL_ERCOT_GEN_100_30	-10.2261	110.845	20.0888	143.442	192.311	19.2859	4.42	100	3	64.341	0.126314	52.6912	67.5342	75.2203	1167.41	27.1999	11.4191	386.907	0.336991	0.0222389
NETL_ERCOT_GEN_250_30	256.862	377.951	239.533	404.352	444.455	-24.7777	4.42	250	3	111.265	0.126314	80.8868	125.269	140.145	1289.15	56.1503	4.56794	90.9332	0.232781	0.0387437
NETL_ERCOT_GEN_25_30	-139.818	-23.6707	16.5829	96.9664	173.634	148.67	4.42	25	3	40.702	0.126314	34.7532	40.6694	45.8509	345.554	11.9194	4.1028	88.4141	0.195077	0.0125112
NETL_ERCOT_GEN_50_30	-98.8082	20.3876	13.1798	84.8347	174.946	101.681	4.42	50	3	48.4546	0.126314	41.4196	50.3226	54.4781	841.245	17.649	12.8409	513.117	0.321417	0.0233085
NYISO_2019_30	-162.099	-90.7837	85.375	219.314	224.719	279.563	3.05	0	3	20.0901	-186.74	14.07	19.18	24.56	356.71	14.8361	3.19974	76.6679	0.141063	0.00197746
NYISO_2022_30	-87.5713	1.92234	-47.7582	173.442	160.062	129.968	7.57	0	3	53.6445	-410.7	24.7	43.98	66.5375	2829.46	73.7528	15.1126	457.642	0.497978	0.0041326
PJM_WEST_2019_30	-143.545	-46.9634	112.306	198.814	245.27	243.796	2.43	0	3	26.38	-52.9956	19.6223	23.1215	27.5677	746.585	22.9533	17.2221	426.54	0.692835	0.00274863
PJM_WEST_2022_30	-34.9044	91.1922	-4.33898	154.062	191.738	31.1428	7.04	0	3	74.2523	-20.2954	44.4271	58.1489	81.3789	3794.43	118.222	19.7849	478.581	0.814902	0.00247495
SPP_NORTH_2019_30	-147.454	-79.6	107.54	245.97	245.978	287.27	2.75	0	3	20.1862	-46.4777	12.2819	16.905	21.6298	1130.72	31.469	14.1731	356.423	0.561665	0.00242402
SPP_NORTH_2022_30	-128.564	-64.9629	-96.9877	193.763	128.052	211.312	8.21	0	3	35.7142	-102.798	9.72215	25.5635	52.3684	1161.63	50.0989	5.22841	66.2783	0.409015	0.00176584
SPP_SOUTH_2019_30	-142.08	-72.1162	106.136	245.122	247.879	281.171	2.83	0	3	21.4836	-43.7243	12.8588	18.4743	23.2245	1210.58	35.3158	13.0933	308.231	0.554039	0.00162879
SPP_SOUTH_2022_30	-78.1504	2.89315	-40.0472	200.615	173.499	140.378	7.61	0	3	52.4427	-38.083	19.2189	40.4408	69.9561	1356.88	60.5277	4.11552	45.5524	0.369439	0.0017095
WinterNYCapRes_2030_30	-165.958	-84.3387	88.3655	206.059	223.704	264.975	2.94	0	3	22.3565	1.06e-08	19.025	20.525	23.6601	135.512	9.70417	6.37768	56.9343	0.69533	0.0300593
WinterNYTaxCapRes_2030_30	-71.6226	30.9754	82.4234	125.366	231.662	148.565	2.94	60	3	41.8251	7.11e-08	37.718	43.683	47.4337	223.234	21.0337	1.76945	10.4959	0.306065	0.0453158
WinterNYTax_2030_30	-39.061	65.1672	89.7566	130.033	241.699	118.189	2.94	60	3	48.004	1.36e-08	44.036	46.224	51.965	1800	44.4711	22.4425	734.263	0.684513	0.0355123
WinterNY_2030_30	-142.263	-46.9502	104.942	204.621	243.319	240.685	2.94	0	3	29.0879	2.6e-07	21.548	23.726	28.2427	4257.43	81.723	31.5358	1215.07	0.817279	0.0356353

## Sheet: Filterable Sortable Data
*** Data best viewed by filtering out all but one hydrogen price in column N ***			(M$/yr)	(M$/yr)	(M$/yr)	(M$/yr)	(M$/yr)	(M$/yr)	(M$/yr)	(M$/yr)	($/MMBtu)	($/tonne)	($/kg)	($/MWh)	($/MWh)	($/MWh)	($/MWh)	($/MWh)	($/MWh)	($/MWh)
Name	Year	Reference	NGCC	SOFC	NGCC + SOEC	rSOC	SOFC+SOEC	SOEC	SMR	ATR	Natural Gas Price	Carbon Tax	Hydrogen Price	Mean LMP	Minimum LMP	25th Percentile	50th Percentile	75th Percentile	Maximum LMP	Standard Deviation	Skewness	Kurtosis	Bimodality Coefficient	Dip Test Statistic	Data labels	NGCC	SOFC	NGCC + SOEC	rSOC	SOFC + SOEC	SOEC	SMR	ATR	Passes Neither Test	Passes Bimodality Test Only	Passes Dip Test Only	Passes both tests. Bimodal.
NYISO_2019	2019	1	-162.099	-90.7837	-70.3708	68.445	69.0157	123.498	134.597	150.4	3.05	0	2	20.0901	-186.74	14.07	19.18	24.56	356.71	14.8361	3.19974	76.6679	0.141063	0.00197746	-54.4822	0	0	0	1	1	1	1	1	1	0	0	0
NYISO_2019	2019	1	-161.282	-90.5323	-214.359	-57.5424	-76.7619	-24.6089	-23.083	-7.28011	3.05	0	1	20.0901	-186.74	14.07	19.18	24.56	356.71	14.8361	3.19974	76.6679	0.141063	0.00197746	-52.1531	0	0	0	0	0	0	0	0	1	0	0	0
NYISO_2019	2019	1	-161.282	-90.5323	-146.552	-1.26588	-7.10652	46.8411	55.757	71.5599	3.05	0	1.5	20.0901	-186.74	14.07	19.18	24.56	356.71	14.8361	3.19974	76.6679	0.141063	0.00197746	-53.9476	0	0	0	0	0	1	1	1	1	0	0	0
NYISO_2019	2019	1	-161.282	-90.5323	7.24061	143.052	146.564	201.313	213.437	229.24	3.05	0	2.5	20.0901	-186.74	14.07	19.18	24.56	356.71	14.8361	3.19974	76.6679	0.141063	0.00197746	-54.7486	0	0	1	1	1	1	1	1	1	0	0	0
NYISO_2019	2019	1	-161.282	-90.5323	85.3752	219.314	224.719	279.563	292.277	308.08	3.05	0	3	20.0901	-186.74	14.07	19.18	24.56	356.71	14.8361	3.19974	76.6679	0.141063	0.00197746	-54.8441	0	0	1	1	1	1	1	1	1	0	0	0
SPP_NORTH_2019	2019	1	-147.454	-79.6	-45.0988	98.2902	93.4064	133.733	143.359	158.604	2.75	0	2	20.1862	-46.4777	12.2819	16.905	21.6298	1130.72	31.469	14.1731	356.423	0.561665	0.00242402	-40.3268	0	0	0	1	1	1	1	1	0	1	0	0
SPP_NORTH_2019	2019	1	-146.353	-79.3487	-190.763	-34.7299	-52.0794	-14.3896	-14.3205	0.92389	2.75	0	1	20.1862	-46.4777	12.2819	16.905	21.6298	1130.72	31.469	14.1731	356.423	0.561665	0.00242402	-37.6898	0	0	0	0	0	0	0	1	0	1	0	0
SPP_NORTH_2019	2019	1	-146.353	-79.3487	-119.622	27.5301	18.9387	58.4007	64.5195	79.7639	2.75	0	1.5	20.1862	-46.4777	12.2819	16.905	21.6298	1130.72	31.469	14.1731	356.423	0.561665	0.00242402	-39.4621	0	0	0	1	1	1	1	1	0	1	0	0
SPP_NORTH_2019	2019	1	-146.353	-79.3487	30.8134	171.502	169.283	210.176	222.199	237.444	2.75	0	2.5	20.1862	-46.4777	12.2819	16.905	21.6298	1130.72	31.469	14.1731	356.423	0.561665	0.00242402	-40.8933	0	0	1	1	1	1	1	1	0	1	0	0
SPP_NORTH_2019	2019	1	-146.353	-79.3487	107.54	245.97	245.978	287.27	301.039	316.284	2.75	0	3	20.1862	-46.4777	12.2819	16.905	21.6298	1130.72	31.469	14.1731	356.423	0.561665	0.00242402	-41.2916	0	0	1	1	1	1	1	1	0	1	0	0
SPP_SOUTH_2019	2019	1	-140.979	-71.7755	-188.069	-27.511	-46.0423	-16.8385	-17.0787	-2.09964	2.83	0	1	21.4836	-43.7243	12.8588	18.4743	23.2245	1210.58	35.3158	13.0933	308.231	0.554039	0.00162879	-29.2038	0	0	0	0	0	0	0	0	1	0	0	0
SPP_SOUTH_2019	2019	1	-140.979	-71.7755	-118.811	30.7851	23.0841	54.1129	61.7613	76.7404	2.83	0	1.5	21.4836	-43.7243	12.8588	18.4743	23.2245	1210.58	35.3158	13.0933	308.231	0.554039	0.00162879	-31.0288	0	0	0	1	1	1	1	1	1	0	0	0
SPP_SOUTH_2019	2019	1	-140.979	-71.7755	29.8649	171.639	171.644	204.45	219.441	234.42	2.83	0	2.5	21.4836	-43.7243	12.8588	18.4743	23.2245	1210.58	35.3158	13.0933	308.231	0.554039	0.00162879	-32.8064	0	0	1	1	1	1	1	1	1	0	0	0
SPP_SOUTH_2019	2019	1	-140.979	-71.7755	106.136	245.122	247.879	281.171	298.281	313.26	2.83	0	3	21.4836	-43.7243	12.8588	18.4743	23.2245	1210.58	35.3158	13.0933	308.231	0.554039	0.00162879	-33.2924	0	0	1	1	1	1	1	1	1	0	0	0
SPP_SOUTH_2019	2019	1	-142.08	-72.1162	-45.3171	99.7099	96.5127	128.613	140.601	155.58	2.83	0	2	21.4836	-43.7243	12.8588	18.4743	23.2245	1210.58	35.3158	13.0933	308.231	0.554039	0.00162879	-32.1001	0	0	0	1	1	1	1	1	1	0	0	0
MISO_MINNESOTA_2019	2019	1	-164.41	-101.966	-218.696	-82.5895	-102.311	-37.6101	-43.6134	-27.202	3.73	0	1	21.9714	-38.56	17.17	20.185	23.66	661.22	16.9596	19.5937	593.609	0.645171	0.00192215	-64.7005	0	0	0	0	0	0	0	0	0	1	0	0
MISO_MINNESOTA_2019	2019	1	-164.41	-101.966	-174.504	-19.6719	-30.5167	35.8466	35.2266	51.638	3.73	0	1.5	21.9714	-38.56	17.17	20.185	23.66	661.22	16.9596	19.5937	593.609	0.645171	0.00192215	-66.3632	0	0	0	0	0	1	1	1	0	1	0	0
MISO_MINNESOTA_2019	2019	1	-164.41	-101.966	-20.0849	129.172	123.779	190.579	192.907	209.318	3.73	0	2.5	21.9714	-38.56	17.17	20.185	23.66	661.22	16.9596	19.5937	593.609	0.645171	0.00192215	-66.7994	0	0	0	1	1	1	1	1	0	1	0	0
MISO_MINNESOTA_2019	2019	1	-164.41	-101.966	58.0627	206.16	201.971	268.837	271.747	288.158	3.73	0	3	21.9714	-38.56	17.17	20.185	23.66	661.22	16.9596	19.5937	593.609	0.645171	0.00192215	-66.8662	0	0	1	1	1	1	1	1	0	1	0	0
MISO_MINNESOTA_2019	2019	1	-165.037	-102.055	-97.7707	53.3383	46.164	112.693	114.067	130.478	3.73	0	2	21.9714	-38.56	17.17	20.185	23.66	661.22	16.9596	19.5937	593.609	0.645171	0.00192215	-66.5294	0	0	0	1	1	1	1	1	0	1	0	0
MISO_LOUISIANA_2019	2019	1	-157.451	-64.4088	-57.2369	47.2705	77.4221	95.4081	142.457	156.203	2.73	0	2	24.8589	-31.26	20.1	22.67	25.8225	968.31	18.6434	23.6336	909.84	0.612975	0.00234946	-17.9859	0	0	0	1	1	1	1	1	0	1	0	0
MISO_LOUISIANA_2019	2019	1	-156.593	-64.4088	-206.844	-63.5517	-68.4219	-53.0035	-15.2232	-1.4771	2.73	0	1	24.8589	-31.26	20.1	22.67	25.8225	968.31	18.6434	23.6336	909.84	0.612975	0.00234946	-15.4184	0	0	0	0	0	0	0	0	0	1	0	0
MISO_LOUISIANA_2019	2019	1	-156.593	-64.4088	-133.661	-21.8446	1.05503	18.5519	63.6168	77.3629	2.73	0	1.5	24.8589	-31.26	20.1	22.67	25.8225	968.31	18.6434	23.6336	909.84	0.612975	0.00234946	-17.4969	0	0	0	0	1	1	1	1	0	1	0	0
MISO_LOUISIANA_2019	2019	1	-156.593	-64.4088	20.3817	121.927	155.015	173.235	221.297	235.043	2.73	0	2.5	24.8589	-31.26	20.1	22.67	25.8225	968.31	18.6434	23.6336	909.84	0.612975	0.00234946	-18.22	0	0	1	1	1	1	1	1	0	1	0	0
MISO_LOUISIANA_2019	2019	1	-156.593	-64.4088	98.4476	198.332	233.069	251.431	300.137	313.883	2.73	0	3	24.8589	-31.26	20.1	22.67	25.8225	968.31	18.6434	23.6336	909.84	0.612975	0.00234946	-18.3624	0	0	1	1	1	1	1	1	0	1	0	0
ERCOT_WEST_2019	2019	1	-121.286	-41.0073	-11.9799	106.771	123.549	115.41	151.995	164.722	2.39	0	2	26.2011	-24.6412	14.5192	18.7915	24.5414	4697.2	107.584	31.6666	1160.65	0.862612	0.0051146	8.1392	0	0	0	1	1	1	1	1	0	1	0	0
ERCOT_WEST_2019	2019	1	-120.392	-41.0073	-155.027	-13.3073	-19.2019	-27.6825	-5.68538	7.04162	2.39	0	1	26.2011	-24.6412	14.5192	18.7915	24.5414	4697.2	107.584	31.6666	1160.65	0.862612	0.0051146	8.48063	0	0	0	0	0	0	0	1	0	1	0	0
ERCOT_WEST_2019	2019	1	-120.392	-41.0073	-86.565	40.1325	49.0291	41.2935	73.1546	85.8816	2.39	0	1.5	26.2011	-24.6412	14.5192	18.7915	24.5414	4697.2	107.584	31.6666	1160.65	0.862612	0.0051146	7.73561	0	0	0	1	1	1	1	1	0	1	0	0
ERCOT_WEST_2019	2019	1	-120.392	-41.0073	64.1438	178.981	199.639	191.681	230.835	243.562	2.39	0	2.5	26.2011	-24.6412	14.5192	18.7915	24.5414	4697.2	107.584	31.6666	1160.65	0.862612	0.0051146	7.95841	0	0	1	1	1	1	1	1	0	1	0	0
ERCOT_WEST_2019	2019	1	-120.392	-41.0073	140.942	253.413	276.412	268.462	309.675	322.402	2.39	0	3	26.2011	-24.6412	14.5192	18.7915	24.5414	4697.2	107.584	31.6666	1160.65	0.862612	0.0051146	7.94956	0	0	1	1	1	1	1	1	0	1	0	0
PJM_WEST_2019	2019	1	-143.545	-46.9634	-42.2278	52.9131	90.8028	88.739	150.765	163.507	2.43	0	2	26.38	-52.9956	19.6223	23.1215	27.5677	746.585	22.9533	17.2221	426.54	0.692835	0.00274863	2.06379	0	0	0	1	1	1	1	1	0	1	0	0
PJM_WEST_2019	2019	1	-142.659	-46.9634	-182.432	-46.07	-48.9539	-53.2931	-6.91479	5.82666	2.43	0	1	26.38	-52.9956	19.6223	23.1215	27.5677	746.585	22.9533	17.2221	426.54	0.692835	0.00274863	-1.99052	0	0	0	0	0	0	0	1	0	1	0	0
PJM_WEST_2019	2019	1	-142.659	-46.9634	-116.943	-10.1034	16.1865	13.2915	71.9252	84.6667	2.43	0	1.5	26.38	-52.9956	19.6223	23.1215	27.5677	746.585	22.9533	17.2221	426.54	0.692835	0.00274863	2.89501	0	0	0	0	1	1	1	1	0	1	0	0
PJM_WEST_2019	2019	1	-142.659	-46.9634	34.6814	124.316	167.666	165.972	229.605	242.347	2.43	0	2.5	26.38	-52.9956	19.6223	23.1215	27.5677	746.585	22.9533	17.2221	426.54	0.692835	0.00274863	1.69387	0	0	1	1	1	1	1	1	0	1	0	0
PJM_WEST_2019	2019	1	-142.659	-46.9634	112.306	198.814	245.27	243.796	308.445	321.187	2.43	0	3	26.38	-52.9956	19.6223	23.1215	27.5677	746.585	22.9533	17.2221	426.54	0.692835	0.00274863	1.47393	0	0	1	1	1	1	1	1	0	1	0	0
MISO_INDIANA_2019	2019	1	-151.698	-55.7624	-55.2851	46.928	80.0932	87.9163	141.964	155.226	2.73	0	2	26.4054	2.26	20.95	23.33	26.67	936.4	21.6542	19.4117	575.727	0.652834	0.00205479	-7.82313	0	0	0	1	1	1	1	1	0	1	0	0
MISO_INDIANA_2019	2019	1	-150.729	-55.7624	-197.766	-56.4969	-61.9882	-56.7873	-15.716	-2.45412	2.73	0	1	26.4054	2.26	20.95	23.33	26.67	936.4	21.6542	19.4117	575.727	0.652834	0.00205479	-6.22585	0	0	0	0	0	0	0	0	0	1	0	0
MISO_INDIANA_2019	2019	1	-150.729	-55.7624	-130.502	-19.5518	4.95976	12.0463	63.124	76.3859	2.73	0	1.5	26.4054	2.26	20.95	23.33	26.67	936.4	21.6542	19.4117	575.727	0.652834	0.00205479	-7.08658	0	0	0	0	1	1	1	1	0	1	0	0
MISO_INDIANA_2019	2019	1	-150.729	-55.7624	21.704	119.709	157.046	165.221	220.804	234.066	2.73	0	2.5	26.4054	2.26	20.95	23.33	26.67	936.4	21.6542	19.4117	575.727	0.652834	0.00205479	-8.17497	0	0	1	1	1	1	1	1	0	1	0	0
MISO_INDIANA_2019	2019	1	-150.729	-55.7624	99.3765	194.894	234.698	243.091	299.644	312.906	2.73	0	3	26.4054	2.26	20.95	23.33	26.67	936.4	21.6542	19.4117	575.727	0.652834	0.00205479	-8.39221	0	0	1	1	1	1	1	1	0	1	0	0
ERCOT_NORTH_2019	2019	1	-122.15	-37.5806	-13.3168	97.6455	120.853	106.473	151.571	163.881	2.39	0	2	27.5317	-10.4186	16.1815	19.1182	24.5337	4696.89	106.893	31.9975	1178.31	0.867546	0.00347416	14.3799	0	0	0	1	1	1	1	1	0	1	0	0
ERCOT_NORTH_2019	2019	1	-121.255	-37.5806	-156.609	-22.3237	-22.1439	-36.8389	-6.10935	6.20102	2.39	0	1	27.5317	-10.4186	16.1815	19.1182	24.5337	4696.89	106.893	31.9975	1178.31	0.867546	0.00347416	14.695	0	0	0	0	0	0	0	1	0	1	0	0
ERCOT_NORTH_2019	2019	1	-121.255	-37.5806	-87.9443	30.7468	46.2905	32.3278	72.7306	85.041	2.39	0	1.5	27.5317	-10.4186	16.1815	19.1182	24.5337	4696.89	106.893	31.9975	1178.31	0.867546	0.00347416	13.9627	0	0	0	1	1	1	1	1	0	1	0	0
ERCOT_NORTH_2019	2019	1	-121.255	-37.5806	62.8594	169.974	196.997	182.769	230.411	242.721	2.39	0	2.5	27.5317	-10.4186	16.1815	19.1182	24.5337	4696.89	106.893	31.9975	1178.31	0.867546	0.00347416	14.2275	0	0	1	1	1	1	1	1	0	1	0	0
ERCOT_NORTH_2019	2019	1	-121.255	-37.5806	139.681	244.431	273.794	259.571	309.251	321.561	2.39	0	3	27.5317	-10.4186	16.1815	19.1182	24.5337	4696.89	106.893	31.9975	1178.31	0.867546	0.00347416	14.2229	0	0	1	1	1	1	1	1	0	1	0	0
ERCOT_SOUTH_2019	2019	1	-123.437	-37.6088	-159.159	-25.5782	-24.7462	-39.4886	-6.12071	6.1785	2.39	0	1	27.5674	-50.289	16.8211	19.5852	24.8401	4694.81	105.741	32.5313	1210.85	0.872668	0.00149098	12.8626	0	0	0	0	0	0	0	1	0	1	0	0
ERCOT_SOUTH_2019	2019	1	-123.437	-37.6088	-90.2752	25.7806	43.8981	30.1313	72.7193	85.0185	2.39	0	1.5	27.5674	-50.289	16.8211	19.5852	24.8401	4694.81	105.741	32.5313	1210.85	0.872668	0.00149098	13.7668	0	0	0	1	1	1	1	1	0	1	0	0
ERCOT_SOUTH_2019	2019	1	-123.437	-37.6088	61.1239	165.564	195.203	181.079	230.399	242.699	2.39	0	2.5	27.5674	-50.289	16.8211	19.5852	24.8401	4694.81	105.741	32.5313	1210.85	0.872668	0.00149098	14.1236	0	0	1	1	1	1	1	1	0	1	0	0
ERCOT_SOUTH_2019	2019	1	-123.437	-37.6088	138.183	240.402	272.239	258.069	309.239	321.539	2.39	0	3	27.5674	-50.289	16.8211	19.5852	24.8401	4694.81	105.741	32.5313	1210.85	0.872668	0.00149098	14.1709	0	0	1	1	1	1	1	1	0	1	0	0
ERCOT_SOUTH_2019	2019	1	-124.387	-37.6088	-15.2794	92.8356	118.83	104.557	151.559	163.859	2.39	0	2	27.5674	-50.289	16.8211	19.5852	24.8401	4694.81	105.741	32.5313	1210.85	0.872668	0.00149098	14.2722	0	0	0	1	1	1	1	1	0	1	0	0
ERCOT_HOUSTON_2019	2019	1	-120.262	-34.1254	-156.093	-22.6876	-21.3416	-40.5364	-6.32107	5.78125	2.39	0	1	28.1962	-71.9689	16.9036	19.634	24.9981	4694.64	107.056	31.5961	1156.48	0.861864	0.00160583	12.7838	0	0	0	0	0	0	0	1	0	1	0	0
ERCOT_HOUSTON_2019	2019	1	-120.262	-34.1254	-87.803	28.369	46.6947	28.4784	72.5189	84.6212	2.39	0	1.5	28.1962	-71.9689	16.9036	19.634	24.9981	4694.64	107.056	31.5961	1156.48	0.861864	0.00160583	18.2163	0	0	0	1	1	1	1	1	0	1	0	0
ERCOT_HOUSTON_2019	2019	1	-120.262	-34.1254	62.9201	166.95	197.314	178.869	230.199	242.301	2.39	0	2.5	28.1962	-71.9689	16.9036	19.634	24.9981	4694.64	107.056	31.5961	1156.48	0.861864	0.00160583	18.4451	0	0	1	1	1	1	1	1	0	1	0	0
ERCOT_HOUSTON_2019	2019	1	-120.262	-34.1254	139.839	241.312	274.206	255.744	309.039	321.141	2.39	0	3	28.1962	-71.9689	16.9036	19.634	24.9981	4694.64	107.056	31.5961	1156.48	0.861864	0.00160583	18.4626	0	0	1	1	1	1	1	1	0	1	0	0
ERCOT_HOUSTON_2019	2019	1	-121.2	-34.1254	-13.2646	94.8707	121.162	102.544	151.359	163.461	2.39	0	2	28.1962	-71.9689	16.9036	19.634	24.9981	4694.64	107.056	31.5961	1156.48	0.861864	0.00160582	18.6178	0	0	0	1	1	1	1	1	0	1	0	0
ISO_NE_2019	2019	1	-146.038	-71.525	-121.331	40.9285	34.7357	69.3692	88.7243	103.767	4.5	0	2	30.6752	-56.16	19.0475	24.55	35.94	261.35	20.5617	2.80591	13.0445	0.552997	0.00176363	-34.6335	0	0	0	1	1	1	1	1	1	0	0	0
ISO_NE_2019	2019	1	-145.368	-70.771	-199.545	-59.8346	-83.7421	-50.9937	-68.9557	-53.9134	4.5	0	1	30.6752	-56.16	19.0475	24.55	35.94	261.35	20.5617	2.80591	13.0445	0.552997	0.00176363	-32.7484	0	0	0	0	0	0	0	0	1	0	0	0
ISO_NE_2019	2019	1	-145.368	-70.771	-187.686	-15.2963	-31.3331	3.44148	9.88431	24.9266	4.5	0	1.5	30.6752	-56.16	19.0475	24.55	35.94	261.35	20.5617	2.80591	13.0445	0.552997	0.00176363	-34.7746	0	0	0	0	0	1	1	1	1	0	0	0
ISO_NE_2019	2019	1	-145.368	-70.771	-48.9872	104.579	106.929	142.547	167.564	182.607	4.5	0	2.5	30.6752	-56.16	19.0475	24.55	35.94	261.35	20.5617	2.80591	13.0445	0.552997	0.00176363	-35.6182	0	0	0	1	1	1	1	1	1	0	0	0
ISO_NE_2019	2019	1	-145.368	-70.771	26.0596	173.012	181.888	217.939	246.404	261.447	4.5	0	3	30.6752	-56.16	19.0475	24.55	35.94	261.35	20.5617	2.80591	13.0445	0.552997	0.00176363	-36.051	0	0	1	1	1	1	1	1	1	0	0	0
CAISO_ZP26_2019	2019	1	-123.959	-31.0274	-88.0619	50.619	64.6316	48.6424	105.711	118.191	3.87	0	2	35.3162	-40.6231	21.9893	30.6805	41.6525	1065.91	38.8525	14.0379	289.042	0.678195	0.00520961	15.9892	0	0	0	1	1	1	1	1	0	1	0	0
CAISO_ZP26_2019	2019	1	-122.773	-30.7761	-180.572	-19.1372	-36.9693	-53.5689	-51.969	-39.4895	3.87	0	1	35.3162	-40.6231	21.9893	30.6805	41.6525	1065.91	38.8525	14.0379	289.042	0.678195	0.00520961	-6.19329	0	0	0	0	0	0	0	0	0	1	0	0
CAISO_ZP26_2019	2019	1	-122.773	-30.7761	-149.976	7.53273	3.19304	-13.7511	26.871	39.3505	3.87	0	1.5	35.3162	-40.6231	21.9893	30.6805	41.6525	1065.91	38.8525	14.0379	289.042	0.678195	0.00520961	16.9442	0	0	0	1	1	0	1	1	0	1	0	0
CAISO_ZP26_2019	2019	1	-122.773	-30.7761	-16.5907	106.228	135.894	120.754	184.551	197.031	3.87	0	2.5	35.3162	-40.6231	21.9893	30.6805	41.6525	1065.91	38.8525	14.0379	289.042	0.678195	0.00520961	15.1409	0	0	0	1	1	1	1	1	0	1	0	0
CAISO_ZP26_2019	2019	1	-122.773	-30.7761	58.4504	170.374	210.83	195.661	263.391	275.871	3.87	0	3	35.3162	-40.6231	21.9893	30.6805	41.6525	1065.91	38.8525	14.0379	289.042	0.678195	0.00520961	15.1695	0	0	1	1	1	1	1	1	0	1	0	0
CAISO_NP15_2019	2019	1	-124.37	-30.2633	-88.6897	48.0462	63.8078	46.7949	105.622	118.015	3.87	0	2	35.5941	-43.3701	22.9445	30.8378	41.7378	1013.67	37.846	13.8163	281.649	0.674126	0.00525771	17.0129	0	0	0	1	1	1	1	1	0	1	0	0
CAISO_NP15_2019	2019	1	-123.195	-30.012	-180.456	-20.0155	-37.2867	-53.4948	-52.0576	-39.665	3.87	0	1	35.5941	-43.3701	22.9445	30.8378	41.7378	1013.67	37.846	13.8163	281.649	0.674126	0.00525771	-7.27478	0	0	0	0	0	0	0	0	0	1	0	0
CAISO_NP15_2019	2019	1	-123.195	-30.012	-150.657	5.31453	2.29497	-15.422	26.7824	39.175	3.87	0	1.5	35.5941	-43.3701	22.9445	30.8378	41.7378	1013.67	37.846	13.8163	281.649	0.674126	0.00525771	17.717	0	0	0	1	1	0	1	1	0	1	0	0
CAISO_NP15_2019	2019	1	-123.195	-30.012	-17.084	103.552	135.21	118.796	184.462	196.855	3.87	0	2.5	35.5941	-43.3701	22.9445	30.8378	41.7378	1013.67	37.846	13.8163	281.649	0.674126	0.00525771	16.4131	0	0	0	1	1	1	1	1	0	1	0	0
CAISO_NP15_2019	2019	1	-123.195	-30.012	57.9932	167.808	210.186	193.74	263.302	275.695	3.87	0	3	35.5941	-43.3701	22.9445	30.8378	41.7378	1013.67	37.846	13.8163	281.649	0.674126	0.00525771	16.4465	0	0	1	1	1	1	1	1	0	1	0	0
CAISO_SP15_2019	2019	1	-121.715	-28.6865	-86.9165	52.3345	65.9645	46.7926	105.569	117.908	3.87	0	2	35.7629	-36.4988	21.9076	30.8134	42.2941	980.315	39.3494	13.0501	246.636	0.68622	0.00572128	19.172	0	0	0	1	1	1	1	1	0	1	0	0
CAISO_SP15_2019	2019	1	-120.501	-28.4352	-178.364	-16.9714	-34.4385	-53.7457	-52.1113	-39.7717	3.87	0	1	35.7629	-36.4988	21.9076	30.8134	42.2941	980.315	39.3494	13.0501	246.636	0.68622	0.00572128	-6.00333	0	0	0	0	0	0	0	0	0	1	0	0
CAISO_SP15_2019	2019	1	-120.501	-28.4352	-148.009	9.73303	5.35665	-15.3575	26.7287	39.0683	3.87	0	1.5	35.7629	-36.4988	21.9076	30.8134	42.2941	980.315	39.3494	13.0501	246.636	0.68622	0.00572128	20.7141	0	0	0	1	1	0	1	1	0	1	0	0
CAISO_SP15_2019	2019	1	-120.501	-28.4352	-15.9028	107.122	136.751	118.807	184.409	196.748	3.87	0	2.5	35.7629	-36.4988	21.9076	30.8134	42.2941	980.315	39.3494	13.0501	246.636	0.68622	0.00572128	17.9439	0	0	0	1	1	1	1	1	0	1	0	0
CAISO_SP15_2019	2019	1	-120.501	-28.4352	59.0319	170.428	211.577	193.458	263.249	275.588	3.87	0	3	35.7629	-36.4988	21.9076	30.8134	42.2941	980.315	39.3494	13.0501	246.636	0.68622	0.00572128	18.1181	0	0	1	1	1	1	1	1	0	1	0	0
SPP_NORTH_2022	2022	2	-128.564	-64.9629	-198.675	76.4935	1.16879	79.6712	-21.6225	-1.62378	8.21	0	2	35.7142	-102.798	9.72215	25.5635	52.3684	1161.63	50.0989	5.22841	66.2783	0.409015	0.00176584	-78.5024	0	0	0	1	1	1	0	0	1	0	0	0
SPP_NORTH_2022	2022	2	-127.543	-60.098	-196.041	-15.6332	-79.7577	-16.9892	-179.302	-159.304	8.21	0	1	35.7142	-102.798	9.72215	25.5635	52.3684	1161.63	50.0989	5.22841	66.2783	0.409015	0.00176584	-62.7685	0	0	0	0	0	0	0	0	1	0	0	0
SPP_NORTH_2022	2022	2	-127.543	-60.098	-196.164	24.9679	-51.6877	25.3712	-100.462	-80.4638	8.21	0	1.5	35.7142	-102.798	9.72215	25.5635	52.3684	1161.63	50.0989	5.22841	66.2783	0.409015	0.00176584	-77.059	0	0	0	1	0	1	0	0	1	0	0	0
SPP_NORTH_2022	2022	2	-127.543	-60.098	-163.163	133.358	62.1598	143.75	57.2175	77.2162	8.21	0	2.5	35.7142	-102.798	9.72215	25.5635	52.3684	1161.63	50.0989	5.22841	66.2783	0.409015	0.00176584	-81.59	0	0	0	1	1	1	1	1	1	0	0	0
SPP_NORTH_2022	2022	2	-127.543	-60.098	-96.9947	193.763	128.052	211.312	136.058	156.056	8.21	0	3	35.7142	-102.798	9.72215	25.5635	52.3684	1161.63	50.0989	5.22841	66.2783	0.409015	0.00176584	-83.2599	0	0	0	1	1	1	1	1	1	0	0	0
MISO_MINNESOTA_2022	2022	2	-135.673	-63.367	-202.105	20.3373	-23.2874	21.4088	-19.3109	-2.23663	8.04	0	2	44.0975	-62.28	23.52	36.915	55.6825	1781.78	49.0906	14.5568	395.169	0.5347	0.00196058	-44.6963	0	0	0	1	0	1	0	0	1	0	0	0
MISO_MINNESOTA_2022	2022	2	-134.567	-60.2615	-198.425	-47.7093	-83.1018	-56.2059	-176.991	-159.917	8.04	0	1	44.0975	-62.28	23.52	36.915	55.6825	1781.78	49.0906	14.5568	395.169	0.5347	0.00196058	-26.8959	0	0	0	0	0	0	0	0	1	0	0	0
MISO_MINNESOTA_2022	2022	2	-134.567	-60.2615	-198.303	-21.9473	-68.906	-25.9349	-98.1509	-81.0766	8.04	0	1.5	44.0975	-62.28	23.52	36.915	55.6825	1781.78	49.0906	14.5568	395.169	0.5347	0.00196058	-42.9711	0	0	0	0	0	0	0	0	1	0	0	0
MISO_MINNESOTA_2022	2022	2	-134.567	-60.2615	-169.383	72.4142	36.2236	83.6367	59.5291	76.6034	8.04	0	2.5	44.0975	-62.28	23.52	36.915	55.6825	1781.78	49.0906	14.5568	395.169	0.5347	0.00196058	-47.4131	0	0	0	1	1	1	1	1	1	0	0	0
MISO_MINNESOTA_2022	2022	2	-134.567	-60.2615	-102.117	130.776	103.151	152.273	138.369	155.443	8.04	0	3	44.0975	-62.28	23.52	36.915	55.6825	1781.78	49.0906	14.5568	395.169	0.5347	0.00196058	-49.1219	0	0	0	1	1	1	1	1	1	0	0	0
ERCOT_WEST_2022	2022	2	-89.4128	0.854227	-152.667	26.5508	-10.4757	-40.2092	-149.976	-136.613	7.05	0	1	50.3809	-47.6123	22.8137	42.129	64.0505	5143.3	132.176	25.5024	807.542	0.803622	0.0337839	-11.3299	0	1	0	1	0	0	0	0	0	1	0	0
ERCOT_WEST_2022	2022	2	-89.4128	0.854227	-153.123	51.2274	12.0347	-12.3083	-71.1359	-57.7726	7.05	0	1.5	50.3809	-47.6123	22.8137	42.129	64.0505	5143.3	132.176	25.5024	807.542	0.803622	0.0337839	11.1804	0	1	0	1	1	0	0	0	0	1	0	0
ERCOT_WEST_2022	2022	2	-89.4128	0.854227	-95.707	129.745	106.397	82.5833	86.5441	99.9074	7.05	0	2.5	50.3809	-47.6123	22.8137	42.129	64.0505	5143.3	132.176	25.5024	807.542	0.803622	0.0337839	23.8134	0	1	0	1	1	1	1	1	0	1	0	0
ERCOT_WEST_2022	2022	2	-89.4128	0.854227	-32.8523	179.705	168.774	145.403	165.384	178.747	7.05	0	3	50.3809	-47.6123	22.8137	42.129	64.0505	5143.3	132.176	25.5024	807.542	0.803622	0.0337839	23.3716	0	1	0	1	1	1	1	1	0	1	0	0
ERCOT_WEST_2022	2022	2	-90.4182	-2.50259	-148.296	86.8557	52.9997	26.8168	7.70413	21.0674	7.05	0	2	50.3809	-47.6123	22.8137	42.129	64.0505	5143.3	132.176	25.5024	807.542	0.803622	0.0337839	26.1828	0	0	0	1	1	1	1	1	0	1	0	0
SPP_SOUTH_2022	2022	2	-78.1504	2.89315	-145.206	106.056	63.3266	26.1761	-9.36659	4.33739	7.61	0	2	52.4427	-38.083	19.2189	40.4408	69.9561	1356.88	60.5277	4.11552	45.5524	0.369439	0.0017095	37.1505	0	1	0	1	1	1	0	1	1	0	0	0
SPP_SOUTH_2022	2022	2	-76.7884	7.50669	-148.903	40.6296	-1.48359	-38.7386	-167.047	-153.343	7.61	0	1	52.4427	-38.083	19.2189	40.4408	69.9561	1356.88	60.5277	4.11552	45.5524	0.369439	0.0017095	-8.99028	0	1	0	1	0	0	0	0	1	0	0	0
SPP_SOUTH_2022	2022	2	-76.7884	7.50669	-148.071	67.8653	21.7189	-11.2867	-88.2066	-74.5026	7.61	0	1.5	52.4427	-38.083	19.2189	40.4408	69.9561	1356.88	60.5277	4.11552	45.5524	0.369439	0.0017095	14.2122	0	1	0	1	1	0	0	0	1	0	0	0
SPP_SOUTH_2022	2022	2	-76.7884	7.50669	-99.0339	150.797	114.826	81.0239	69.4734	83.1774	7.61	0	2.5	52.4427	-38.083	19.2189	40.4408	69.9561	1356.88	60.5277	4.11552	45.5524	0.369439	0.0017095	33.8026	0	1	0	1	1	1	1	1	1	0	0	0
SPP_SOUTH_2022	2022	2	-76.7884	7.50669	-40.0517	200.615	173.499	141.132	148.313	162.017	7.61	0	3	52.4427	-38.083	19.2189	40.4408	69.9561	1356.88	60.5277	4.11552	45.5524	0.369439	0.0017095	32.3669	0	1	0	1	1	1	1	1	1	0	0	0
ERCOT_SOUTH_2022	2022	2	-96.2237	-2.5402	-156.971	3.31802	-19.0743	-59.4667	-150.972	-138.588	7.05	0	1	53.5081	-31.1793	28.1462	43.3772	63.0541	4680.66	114.065	25.2363	817.195	0.777704	0.00380378	-16.5341	0	0	0	1	0	0	0	0	0	1	0	0
ERCOT_SOUTH_2022	2022	2	-96.2237	-2.5402	-157.035	22.1212	-4.11494	-35.8118	-72.1323	-59.7482	7.05	0	1.5	53.5081	-31.1793	28.1462	43.3772	63.0541	4680.66	114.065	25.2363	817.195	0.777704	0.00380378	-1.57473	0	0	0	1	0	0	0	0	0	1	0	0
ERCOT_SOUTH_2022	2022	2	-96.2237	-2.5402	-104.507	97.9882	89.3842	55.6789	85.5477	97.9318	7.05	0	2.5	53.5081	-31.1793	28.1462	43.3772	63.0541	4680.66	114.065	25.2363	817.195	0.777704	0.00380378	33.7053	0	0	0	1	1	1	1	1	0	1	0	0
ERCOT_SOUTH_2022	2022	2	-96.2237	-2.5402	-40.4572	147.901	152.901	118.866	164.388	176.772	7.05	0	3	53.5081	-31.1793	28.1462	43.3772	63.0541	4680.66	114.065	25.2363	817.195	0.777704	0.00380378	34.035	0	0	0	1	1	1	1	1	0	1	0	0
ERCOT_SOUTH_2022	2022	2	-97.146	-3.88626	-155.011	55.6775	35.8703	0.444594	6.70769	19.0918	7.05	0	2	53.5081	-31.1793	28.1462	43.3772	63.0541	4680.66	114.065	25.2363	817.195	0.777704	0.00380378	35.4257	0	0	0	1	1	1	1	1	0	1	0	0
NYISO_2022	2022	2	-86.4891	4.02243	-148.408	26.8572	-8.58109	-44.0309	-166.257	-153	7.57	0	1	53.6445	-410.7	24.7	43.98	66.5375	2829.46	73.7528	15.1126	457.642	0.497978	0.0041326	-12.6035	0	1	0	1	0	0	0	0	1	0	0	0
NYISO_2022	2022	2	-86.4891	4.02243	-147.819	48.9219	9.89877	-19.5527	-87.4171	-74.1599	7.57	0	1.5	53.6445	-410.7	24.7	43.98	66.5375	2829.46	73.7528	15.1126	457.642	0.497978	0.0041326	5.87634	0	1	0	1	1	0	0	0	1	0	0	0
NYISO_2022	2022	2	-86.4891	4.02243	-108.761	124.701	99.3711	70.3638	70.2629	83.5201	7.57	0	2.5	53.6445	-410.7	24.7	43.98	66.5375	2829.46	73.7528	15.1126	457.642	0.497978	0.0041326	29.0073	0	1	0	1	1	1	1	1	1	0	0	0
NYISO_2022	2022	2	-86.4891	4.02243	-47.7591	173.442	160.062	131.225	149.103	162.36	7.57	0	3	53.6445	-410.7	24.7	43.98	66.5375	2829.46	73.7528	15.1126	457.642	0.497978	0.0041326	28.8377	0	1	0	1	1	1	1	1	1	0	0	0
NYISO_2022	2022	2	-87.5713	1.92234	-148.742	82.3339	48.1404	16.3152	-8.57713	4.6801	7.57	0	2	53.6445	-410.7	24.7	43.98	66.5375	2829.46	73.7528	15.1126	457.642	0.497978	0.0041326	31.8251	0	1	0	1	1	1	0	1	1	0	0	0
ERCOT_NORTH_2022	2022	2	-90.4346	4.81314	-152.294	9.12516	-11.186	-61.4931	-151.467	-139.569	7.05	0	1	55.0602	-464.73	28.1067	44.2324	64.2469	5073.44	130.888	25.9057	819.627	0.817022	0.00478209	-15.9991	0	1	0	1	0	0	0	0	0	1	0	0
ERCOT_NORTH_2022	2022	2	-90.4346	4.81314	-152.361	27.571	2.74864	-38.8243	-72.6269	-60.7288	7.05	0	1.5	55.0602	-464.73	28.1067	44.2324	64.2469	5073.44	130.888	25.9057	819.627	0.817022	0.00478209	-2.0645	0	1	0	1	1	0	0	0	0	1	0	0
ERCOT_NORTH_2022	2022	2	-90.4346	4.81314	-99.2944	101.345	94.692	51.8773	85.0531	96.9512	7.05	0	2.5	55.0602	-464.73	28.1067	44.2324	64.2469	5073.44	130.888	25.9057	819.627	0.817022	0.00478209	42.8147	0	1	0	1	1	1	1	1	0	1	0	0
ERCOT_NORTH_2022	2022	2	-90.4346	4.81314	-36.4845	150.609	157.009	114.879	163.893	175.791	7.05	0	3	55.0602	-464.73	28.1067	44.2324	64.2469	5073.44	130.888	25.9057	819.627	0.817022	0.00478209	42.1299	0	1	0	1	1	1	1	1	0	1	0	0
ERCOT_NORTH_2022	2022	2	-91.3785	3.21574	-149.747	60.1183	41.764	-2.50563	6.21314	18.1112	7.05	0	2	55.0602	-464.73	28.1067	44.2324	64.2469	5073.44	130.888	25.9057	819.627	0.817022	0.00478209	38.5483	0	1	0	1	1	0	1	1	0	1	0	0
ERCOT_HOUSTON_2022	2022	2	-60.9821	38.6051	-122.23	39.739	25.8127	-64.2901	-153.67	-143.937	7.05	0	1	61.9753	-28.7943	30.7843	46.5179	68.535	4835.43	146.369	20.3951	525.174	0.789439	0.00336158	-12.7924	0	1	0	1	1	0	0	0	0	1	0	0
ERCOT_HOUSTON_2022	2022	2	-60.9821	38.6051	-122.009	54.9704	36.9202	-45.8036	-74.8303	-65.0974	7.05	0	1.5	61.9753	-28.7943	30.7843	46.5179	68.535	4835.43	146.369	20.3951	525.174	0.789439	0.00336158	-1.68493	0	1	0	1	1	0	0	0	0	1	0	0
ERCOT_HOUSTON_2022	2022	2	-60.9821	38.6051	-72.2899	123.464	123.389	37.9392	82.8497	92.5826	7.05	0	2.5	61.9753	-28.7943	30.7843	46.5179	68.535	4835.43	146.369	20.3951	525.174	0.789439	0.00336158	84.7843	0	1	0	1	1	1	1	1	0	1	0	0
ERCOT_HOUSTON_2022	2022	2	-60.9821	38.6051	-12.0362	170.019	183.111	97.6861	161.69	171.423	7.05	0	3	61.9753	-28.7943	30.7843	46.5179	68.535	4835.43	146.369	20.3951	525.174	0.789439	0.00336158	85.4245	0	1	0	1	1	1	1	1	0	1	0	0
ERCOT_HOUSTON_2022	2022	2	-61.9691	37.2591	-120.151	84.879	73.2122	-12.7441	4.00971	13.7426	7.05	0	2	61.9753	-28.7943	30.7843	46.5179	68.535	4835.43	146.369	20.3951	525.174	0.789439	0.00336158	35.9531	0	1	0	1	1	0	1	1	0	1	0	0
MISO_LOUISIANA_2022	2022	2	-106.222	1.79451	-168.434	19.4453	9.28249	-41.0058	-25.1672	-13.8476	8.04	0	2	62.4765	-3.03	40.29	52.905	71.82	2009.43	60.1612	16.3725	397.407	0.671959	0.00181516	7.48798	0	1	0	1	1	0	0	0	0	1	0	0
MISO_LOUISIANA_2022	2022	2	-105.229	2.38653	-166.317	-2.77564	-14.3584	-67.1564	-182.847	-171.528	8.04	0	1	62.4765	-3.03	40.29	52.905	71.82	2009.43	60.1612	16.3725	397.407	0.671959	0.00181516	-16.7449	0	1	0	0	0	0	0	0	0	1	0	0
MISO_LOUISIANA_2022	2022	2	-105.229	2.38653	-166.316	1.28817	-14.0409	-62.6487	-104.007	-92.6876	8.04	0	1.5	62.4765	-3.03	40.29	52.905	71.82	2009.43	60.1612	16.3725	397.407	0.671959	0.00181516	-16.4274	0	1	0	1	0	0	0	0	0	1	0	0
MISO_LOUISIANA_2022	2022	2	-105.229	2.38653	-146.678	51.2713	53.3779	0.116979	53.6728	64.9924	8.04	0	2.5	62.4765	-3.03	40.29	52.905	71.82	2009.43	60.1612	16.3725	397.407	0.671959	0.00181516	50.9913	0	1	0	1	1	1	1	1	0	1	0	0
MISO_LOUISIANA_2022	2022	2	-105.229	2.38653	-88.9869	93.2634	110.506	57.3891	132.513	143.832	8.04	0	3	62.4765	-3.03	40.29	52.905	71.82	2009.43	60.1612	16.3725	397.407	0.671959	0.00181516	53.117	0	1	0	1	1	1	1	1	0	1	0	0
MISO_INDIANA_2022	2022	2	-70.486	49.3431	-149.766	60.4036	55.5993	-52.1785	-28.0306	-19.525	8.04	0	2	71.4631	-4.43	44.3475	58.255	81.5925	2411.71	70.2745	14.6369	366.39	0.582687	0.0024691	6.2562	0	1	0	1	1	0	0	0	0	1	0	0
MISO_INDIANA_2022	2022	2	-69.1609	49.4324	-131.619	45.0356	37.6336	-67.1484	-185.711	-177.205	8.04	0	1	71.4631	-4.43	44.3475	58.255	81.5925	2411.71	70.2745	14.6369	366.39	0.582687	0.0024691	-11.7988	0	1	0	1	1	0	0	0	0	1	0	0
MISO_INDIANA_2022	2022	2	-69.1609	49.4324	-131.619	47.8287	38.4246	-65.4997	-106.871	-98.365	8.04	0	1.5	71.4631	-4.43	44.3475	58.255	81.5925	2411.71	70.2745	14.6369	366.39	0.582687	0.0024691	-11.0078	0	1	0	1	1	0	0	0	0	1	0	0
MISO_INDIANA_2022	2022	2	-69.1609	49.4324	-111.941	85.0837	92.3575	-16.6491	50.8094	59.315	8.04	0	2.5	71.4631	-4.43	44.3475	58.255	81.5925	2411.71	70.2745	14.6369	366.39	0.582687	0.0024691	42.9251	0	1	0	1	1	0	1	1	0	1	0	0
MISO_INDIANA_2022	2022	2	-69.1609	49.4324	-61.4236	119.815	142.3	31.4821	129.649	138.155	8.04	0	3	71.4631	-4.43	44.3475	58.255	81.5925	2411.71	70.2745	14.6369	366.39	0.582687	0.0024691	92.8677	0	1	0	1	1	1	1	1	0	1	0	0
PJM_WEST_2022	2022	2	-33.7577	91.2815	-93.4519	86.5452	83.4063	-67.0677	-157.289	-151.418	7.04	0	1	74.2523	-20.2954	44.4271	58.1489	81.3789	3794.43	118.222	19.7849	478.581	0.814902	0.00247495	-7.87516	0	1	0	1	1	0	0	0	0	1	0	0
PJM_WEST_2022	2022	2	-33.7577	91.2815	-93.4018	89.2123	85.6378	-64.5722	-78.4491	-72.578	7.04	0	1.5	74.2523	-20.2954	44.4271	58.1489	81.3789	3794.43	118.222	19.7849	478.581	0.814902	0.00247495	-5.6437	0	1	0	1	1	0	0	0	0	1	0	0
PJM_WEST_2022	2022	2	-33.7577	91.2815	-55.1592	122.196	141.489	-16.9905	79.2309	85.102	7.04	0	2.5	74.2523	-20.2954	44.4271	58.1489	81.3789	3794.43	118.222	19.7849	478.581	0.814902	0.00247495	50.2075	0	1	0	1	1	0	1	1	0	1	0	0
PJM_WEST_2022	2022	2	-33.7577	91.2815	-4.34201	154.062	191.738	32.9023	158.071	163.942	7.04	0	3	74.2523	-20.2954	44.4271	58.1489	81.3789	3794.43	118.222	19.7849	478.581	0.814902	0.00247495	100.456	0	1	0	1	1	1	1	1	0	1	0	0
PJM_WEST_2022	2022	2	-34.9044	91.1922	-91.861	100.605	104.445	-51.3537	0.390924	6.26205	7.04	0	2	74.2523	-20.2954	44.4271	58.1489	81.3789	3794.43	118.222	19.7849	478.581	0.814902	0.00247495	13.2525	0	1	0	1	1	0	1	1	0	1	0	0
CAISO_ZP26_2022	2022	2	11.4136	132.761	-50.7674	143.02	133.859	-62.3229	-172.139	-167.717	7.47	0	1	81.3012	-35.0853	45.0083	65.3063	86.9177	1976.53	101.724	9.08334	129.987	0.627931	0.00353733	1.09766	1	1	0	1	1	0	0	0	0	1	0	0
CAISO_ZP26_2022	2022	2	11.4136	132.761	-50.7276	153.168	142.706	-52.2686	-93.2985	-88.8772	7.47	0	1.5	81.3012	-35.0853	45.0083	65.3063	86.9177	1976.53	101.724	9.08334	129.987	0.627931	0.00353733	9.94448	1	1	0	1	1	0	0	0	0	1	0	0
CAISO_ZP26_2022	2022	2	11.4136	132.761	-20.3436	189.49	191.302	-2.01003	64.3815	68.8028	7.47	0	2.5	81.3012	-35.0853	45.0083	65.3063	86.9177	1976.53	101.724	9.08334	129.987	0.627931	0.00353733	58.5409	1	1	0	1	1	0	1	1	0	1	0	0
CAISO_ZP26_2022	2022	2	11.4136	132.761	24.1728	216.63	235.054	43.0971	143.221	147.643	7.47	0	3	81.3012	-35.0853	45.0083	65.3063	86.9177	1976.53	101.724	9.08334	129.987	0.627931	0.00353733	102.293	1	1	1	1	1	1	1	1	0	1	0	0
CAISO_ZP26_2022	2022	2	10.3654	132.761	-47.2285	168.236	161.322	-35.2107	-14.4585	-10.0372	7.47	0	2	81.3012	-35.0853	45.0083	65.3063	86.9177	1976.53	101.724	9.08334	129.987	0.627931	0.00353733	28.5605	1	1	0	1	1	0	0	0	0	1	0	0
CAISO_SP15_2022	2022	2	24.5613	147.883	-36.928	155.761	149.351	-64.0844	-173.094	-169.611	7.47	0	1	84.2986	-27.4744	46.0654	65.9697	90.0033	1994.73	104.727	8.68144	119.572	0.623036	0.00408991	1.46812	1	1	0	1	1	0	0	0	0	1	0	0
CAISO_SP15_2022	2022	2	24.5613	147.883	-36.598	165.085	157.423	-53.4675	-94.2536	-90.7709	7.47	0	1.5	84.2986	-27.4744	46.0654	65.9697	90.0033	1994.73	104.727	8.68144	119.572	0.623036	0.00408991	9.53982	1	1	0	1	1	0	0	0	0	1	0	0
CAISO_SP15_2022	2022	2	24.5613	147.883	-7.78799	199.52	204.446	-6.95211	63.4264	66.9091	7.47	0	2.5	84.2986	-27.4744	46.0654	65.9697	90.0033	1994.73	104.727	8.68144	119.572	0.623036	0.00408991	56.5626	1	1	0	1	1	0	1	1	0	1	0	0
CAISO_SP15_2022	2022	2	24.5613	147.883	35.7517	225.924	247.187	36.6434	142.266	145.749	7.47	0	3	84.2986	-27.4744	46.0654	65.9697	90.0033	1994.73	104.727	8.68144	119.572	0.623036	0.00408991	99.3036	1	1	1	1	1	1	1	1	0	1	0	0
CAISO_SP15_2022	2022	2	23.55	147.883	-34.0297	179.238	175.103	-38.3548	-15.4136	-11.9309	7.47	0	2	84.2986	-27.4744	46.0654	65.9697	90.0033	1994.73	104.727	8.68144	119.572	0.623036	0.00408991	27.2194	1	1	0	1	1	0	0	0	0	1	0	0
ISO_NE_2022	2022	2	-52.3806	61.7987	-114.843	71.3424	54.4692	-54.0283	-112.041	-102.957	10.76	0	2	84.9154	-150.91	49.545	65.87	98.705	2254.35	64.9244	6.74101	157.497	0.289357	0.00223866	-7.32944	0	1	0	1	1	0	0	0	1	0	0	0
ISO_NE_2022	2022	2	-51.4521	63.6474	-109.47	59.6233	40.7161	-66.8227	-269.721	-260.637	10.76	0	1	84.9154	-150.91	49.545	65.87	98.705	2254.35	64.9244	6.74101	157.497	0.289357	0.00223866	-22.9313	0	1	0	1	1	0	0	0	1	0	0	0
ISO_NE_2022	2022	2	-51.4521	63.6474	-109.463	62.4221	53.1173	-63.595	-190.881	-181.797	10.76	0	1.5	84.9154	-150.91	49.545	65.87	98.705	2254.35	64.9244	6.74101	157.497	0.289357	0.00223866	-10.5301	0	1	0	1	1	0	0	0	1	0	0	0
ISO_NE_2022	2022	2	-51.4521	63.6474	-109.301	92.4342	80.1259	-25.6415	-33.201	-24.1169	10.76	0	2.5	84.9154	-150.91	49.545	65.87	98.705	2254.35	64.9244	6.74101	157.497	0.289357	0.00223866	16.4785	0	1	0	1	1	0	0	0	1	0	0	0
ISO_NE_2022	2022	2	-51.4521	63.6474	-108.507	125.53	122.261	16.3138	45.639	54.7231	10.76	0	3	84.9154	-150.91	49.545	65.87	98.705	2254.35	64.9244	6.74101	157.497	0.289357	0.00223866	58.6134	0	1	0	1	1	1	1	1	1	0	0	0
CAISO_NP15_2022	2022	2	37.5048	170.806	-21.7035	171.467	172.301	-66.3238	-174.794	-172.981	7.47	0	1	89.6334	-16.3892	51.3034	69.9768	91.9737	1971.89	106.444	9.23867	129.129	0.653545	0.00420326	1.49508	1	1	0	1	1	0	0	0	0	1	0	0
CAISO_NP15_2022	2022	2	37.5048	170.806	-21.1957	176.457	176.345	-61.1726	-95.9535	-94.1411	7.47	0	1.5	89.6334	-16.3892	51.3034	69.9768	91.9737	1971.89	106.444	9.23867	129.129	0.653545	0.00420326	5.53819	1	1	0	1	1	0	0	0	0	1	0	0
CAISO_NP15_2022	2022	2	37.5048	170.806	1.91804	201.443	213.516	-25.3218	61.7265	63.5389	7.47	0	2.5	89.6334	-16.3892	51.3034	69.9768	91.9737	1971.89	106.444	9.23867	129.129	0.653545	0.00420326	42.7099	1	1	1	1	1	0	1	1	0	1	0	0
CAISO_NP15_2022	2022	2	37.5048	170.806	41.2151	222.981	251.929	12.8858	140.566	142.379	7.47	0	3	89.6334	-16.3892	51.3034	69.9768	91.9737	1971.89	106.444	9.23867	129.129	0.653545	0.00420326	81.1231	1	1	1	1	1	1	1	1	0	1	0	0
CAISO_NP15_2022	2022	2	36.598	170.806	-19.84	185.961	189.276	-51.5807	-17.1135	-15.3011	7.47	0	2	89.6334	-16.3892	51.3034	69.9768	91.9737	1971.89	106.444	9.23867	129.129	0.653545	0.00420326	18.4698	1	1	0	1	1	0	0	0	0	1	0	0
HighSolarCapRes_2030	2030	3	-169.923	-95.7993	-68.2278	60.0507	67.1047	122.313	137.863	153.512	2.94	0	2	19.9601	-266.216	17.684	19.618	22.211	123.821	8.8207	-4.11651	250.057	0.0709152	0.058774	-55.2086	0	0	0	1	1	1	1	1	0	0	1	0
HighSolarCapRes_2030	2030	3	-169.622	-95.7993	-232.475	-82.0289	-87.7914	-33.5201	-19.8174	-4.16758	2.94	0	1	19.9601	-266.216	17.684	19.618	22.211	123.821	8.8207	-4.11651	250.057	0.0709152	0.058774	-54.2713	0	0	0	0	0	0	0	0	0	0	1	0
HighSolarCapRes_2030	2030	3	-169.622	-95.7993	-146.227	-17.6136	-10.8859	44.1566	59.0226	74.6724	2.94	0	1.5	19.9601	-266.216	17.684	19.618	22.211	123.821	8.8207	-4.11651	250.057	0.0709152	0.058774	-55.0425	0	0	0	0	0	1	1	1	0	0	1	0
HighSolarCapRes_2030	2030	3	-169.622	-95.7993	10.0887	137.869	145.413	200.722	216.703	232.352	2.94	0	2.5	19.9601	-266.216	17.684	19.618	22.211	123.821	8.8207	-4.11651	250.057	0.0709152	0.058774	-55.3092	0	0	1	1	1	1	1	1	0	0	1	0
HighSolarCapRes_2030	2030	3	-169.622	-95.7993	88.5909	215.86	223.907	279.277	295.543	311.192	2.94	0	3	19.9601	-266.216	17.684	19.618	22.211	123.821	8.8207	-4.11651	250.057	0.0709152	0.058774	-55.3701	0	0	1	1	1	1	1	1	0	0	1	0
BaseCaseCapRes_2030	2030	3	-170.999	-95.5684	-221.44	-84.2867	-89.4864	-35.7751	-19.8651	-4.26217	2.94	0	1	20.1099	-330.008	17.744	19.981	23.246	111.651	8.71278	-16.8003	641.208	0.439685	0.0523286	-53.7113	0	0	0	0	0	0	0	0	0	0	1	0
BaseCaseCapRes_2030	2030	3	-170.999	-95.5684	-147.514	-21.2417	-12.3233	42.2024	58.9749	74.5778	2.94	0	1.5	20.1099	-330.008	17.744	19.981	23.246	111.651	8.71278	-16.8003	641.208	0.439685	0.0523286	-54.5258	0	0	0	0	0	1	1	1	0	0	1	0
BaseCaseCapRes_2030	2030	3	-170.999	-95.5684	9.44362	134.892	144.623	199.286	216.655	232.258	2.94	0	2.5	20.1099	-330.008	17.744	19.981	23.246	111.651	8.71278	-16.8003	641.208	0.439685	0.0523286	-54.6635	0	0	1	1	1	1	1	1	0	0	1	0
BaseCaseCapRes_2030	2030	3	-170.999	-95.5684	88.2003	213.292	223.378	278.057	295.495	311.098	2.94	0	3	20.1099	-330.008	17.744	19.981	23.246	111.651	8.71278	-16.8003	641.208	0.439685	0.0523286	-54.6784	0	0	1	1	1	1	1	1	0	0	1	0
BaseCaseCapRes_2030	2030	3	-171.19	-95.5684	-69.1368	56.6988	66.0484	120.665	137.815	153.418	2.94	0	2	20.1099	-330.008	17.744	19.981	23.246	111.651	8.71278	-16.8003	641.208	0.439685	0.0523286	-54.6163	0	0	0	1	1	1	1	1	0	0	1	0
HighWindCapRes_2030	2030	3	-170.999	-95.5684	-221.44	-84.2867	-89.4862	-35.7751	-19.8651	-4.26217	2.94	0	1	20.1099	-330.008	17.744	19.981	23.246	111.651	8.71278	-16.8003	641.208	0.439685	0.0523287	-53.7112	0	0	0	0	0	0	0	0	0	0	1	0
HighWindCapRes_2030	2030	3	-170.999	-95.5684	-147.514	-21.2412	-12.3231	42.2024	58.9749	74.5778	2.94	0	1.5	20.1099	-330.008	17.744	19.981	23.246	111.651	8.71278	-16.8003	641.208	0.439685	0.0523287	-54.5256	0	0	0	0	0	1	1	1	0	0	1	0
HighWindCapRes_2030	2030	3	-170.999	-95.5684	9.43898	134.903	144.623	199.286	216.655	232.258	2.94	0	2.5	20.1099	-330.008	17.744	19.981	23.246	111.651	8.71278	-16.8003	641.208	0.439685	0.0523287	-54.6635	0	0	1	1	1	1	1	1	0	0	1	0
HighWindCapRes_2030	2030	3	-170.999	-95.5684	88.2003	213.292	223.378	278.057	295.495	311.098	2.94	0	3	20.1099	-330.008	17.744	19.981	23.246	111.651	8.71278	-16.8003	641.208	0.439685	0.0523287	-54.6784	0	0	1	1	1	1	1	1	0	0	1	0
HighWindCapRes_2030	2030	3	-171.19	-95.5684	-69.1368	56.6988	66.0484	120.665	137.815	153.418	2.94	0	2	20.1099	-330.008	17.744	19.981	23.246	111.651	8.71278	-16.8003	641.208	0.439685	0.0523287	-54.6165	0	0	0	1	1	1	1	1	0	0	1	0
WinterNYCapRes_2030	2030	3	-165.958	-84.3387	-67.3692	51.5147	67.9988	108.9	137.099	151.998	2.94	0	2	22.3565	1.06e-08	19.025	20.525	23.6601	135.512	9.70417	6.37768	56.9343	0.69533	0.0300593	-40.9009	0	0	0	1	1	1	1	1	0	1	0	0
WinterNYCapRes_2030	2030	3	-165.423	-84.3387	-217.566	-80.9981	-83.7961	-44.3658	-20.581	-5.68152	2.94	0	1	22.3565	1.06e-08	19.025	20.525	23.6601	135.512	9.70417	6.37768	56.9343	0.69533	0.0300593	-39.4302	0	0	0	0	0	0	0	0	0	1	0	0
WinterNYCapRes_2030	2030	3	-165.423	-84.3387	-144.762	-23.1622	-9.38072	31.2312	58.259	73.1585	2.94	0	1.5	22.3565	1.06e-08	19.025	20.525	23.6601	135.512	9.70417	6.37768	56.9343	0.69533	0.0300593	-40.6119	0	0	0	0	0	1	1	1	0	1	0	0
WinterNYCapRes_2030	2030	3	-165.423	-84.3387	10.3395	128.65	145.696	186.818	215.939	230.838	2.94	0	2.5	22.3565	1.06e-08	19.025	20.525	23.6601	135.512	9.70417	6.37768	56.9343	0.69533	0.0300593	-41.1218	0	0	1	1	1	1	1	1	0	1	0	0
WinterNYCapRes_2030	2030	3	-165.423	-84.3387	88.3656	206.059	223.704	264.975	294.779	309.678	2.94	0	3	22.3565	1.06e-08	19.025	20.525	23.6601	135.512	9.70417	6.37768	56.9343	0.69533	0.0300593	-41.271	0	0	1	1	1	1	1	1	0	1	0	0
WinterNY_2030	2030	3	-141.787	-46.9502	-193.063	-51.4701	-56.2489	-58.9026	-22.7259	-9.93411	2.94	0	1	29.0879	2.6e-07	21.548	23.726	28.2427	4257.43	81.723	31.5358	1215.07	0.817279	0.0356353	-9.29878	0	0	0	0	0	0	0	0	0	1	0	0
WinterNY_2030	2030	3	-141.787	-46.9502	-127.715	-15.1306	10.7039	8.79557	56.1141	68.9059	2.94	0	1.5	29.0879	2.6e-07	21.548	23.726	28.2427	4257.43	81.723	31.5358	1215.07	0.817279	0.0356353	1.90836	0	0	0	0	1	1	1	1	0	1	0	0
WinterNY_2030	2030	3	-141.787	-46.9502	27.1569	127.288	165.541	163.199	213.794	226.586	2.94	0	2.5	29.0879	2.6e-07	21.548	23.726	28.2427	4257.43	81.723	31.5358	1215.07	0.817279	0.0356353	2.34262	0	0	1	1	1	1	1	1	0	1	0	0
WinterNY_2030	2030	3	-141.787	-46.9502	104.942	204.621	243.319	240.936	292.634	305.426	2.94	0	3	29.0879	2.6e-07	21.548	23.726	28.2427	4257.43	81.723	31.5358	1215.07	0.817279	0.0356353	2.38263	0	0	1	1	1	1	1	1	0	1	0	0
WinterNY_2030	2030	3	-142.263	-46.9502	-50.4606	50.8014	87.9314	42.8415	134.954	147.746	2.94	0	2	29.0879	2.6e-07	21.548	23.726	28.2427	4257.43	81.723	31.5358	1215.07	0.817279	0.0356353	45.0899	0	0	0	1	1	1	1	1	0	1	0	0
HighSolar_2030	2030	3	-117.857	-33.569	-26.893	94.4759	116.308	97.8278	134.623	147.089	2.94	0	2	30.1282	-111.287	18.772	22.773	27.4103	1800	91.8303	14.2466	224.056	0.898297	0.0461758	18.4803	0	0	0	1	1	1	1	1	0	1	0	0
HighSolar_2030	2030	3	-116.873	-33.569	-170.751	-15.3698	-25.257	-41.4613	-23.0574	-10.5913	2.94	0	1	30.1282	-111.287	18.772	22.773	27.4103	1800	91.8303	14.2466	224.056	0.898297	0.0461758	8.31202	0	0	0	0	0	0	0	0	0	1	0	0
HighSolar_2030	2030	3	-116.873	-33.569	-102.219	29.0977	40.9934	24.8589	55.7826	68.2487	2.94	0	1.5	30.1282	-111.287	18.772	22.773	27.4103	1800	91.8303	14.2466	224.056	0.898297	0.0461758	16.1344	0	0	0	1	1	1	1	1	0	1	0	0
HighSolar_2030	2030	3	-116.873	-33.569	49.1969	168.717	192.375	173.566	213.463	225.929	2.94	0	2.5	30.1282	-111.287	18.772	22.773	27.4103	1800	91.8303	14.2466	224.056	0.898297	0.0461758	18.8095	0	0	1	1	1	1	1	1	0	1	0	0
HighSolar_2030	2030	3	-116.873	-33.569	125.98	244.055	269.13	250.118	292.303	304.769	2.94	0	3	30.1282	-111.287	18.772	22.773	27.4103	1800	91.8303	14.2466	224.056	0.898297	0.0461758	19.0125	0	0	1	1	1	1	1	1	0	1	0	0
HighWind_2030	2030	3	-121.134	-33.2032	-32.8427	82.3781	110.458	92.5376	134.584	147.012	2.94	0	2	30.2498	-113.282	19.025	24.1294	30.1	1349.59	80.5222	12.4831	162.055	0.950142	0.0361872	17.9199	0	0	0	1	1	1	1	1	0	1	0	0
HighWind_2030	2030	3	-120.261	-33.2032	-171.167	-16.6452	-27.8326	-44.7485	-23.0961	-10.6681	2.94	0	1	30.2498	-113.282	19.025	24.1294	30.1	1349.59	80.5222	12.4831	162.055	0.950142	0.0361872	5.3706	0	0	0	0	0	0	0	0	0	1	0	0
HighWind_2030	2030	3	-120.261	-33.2032	-108.639	21.3779	34.7041	19.098	55.7439	68.1719	2.94	0	1.5	30.2498	-113.282	19.025	24.1294	30.1	1349.59	80.5222	12.4831	162.055	0.950142	0.0361872	15.6061	0	0	0	1	1	1	1	1	0	1	0	0
HighWind_2030	2030	3	-120.261	-33.2032	43.8495	156.179	187.113	169.41	213.424	225.852	2.94	0	2.5	30.2498	-113.282	19.025	24.1294	30.1	1349.59	80.5222	12.4831	162.055	0.950142	0.0361872	17.7026	0	0	1	1	1	1	1	1	0	1	0	0
HighWind_2030	2030	3	-120.261	-33.2032	120.967	232.136	264.232	246.059	292.264	304.692	2.94	0	3	30.2498	-113.282	19.025	24.1294	30.1	1349.59	80.5222	12.4831	162.055	0.950142	0.0361872	18.1734	0	0	1	1	1	1	1	1	0	1	0	0
BaseCase_2030	2030	3	-120.261	-33.2032	-171.167	-16.6452	-27.8539	-44.7485	-23.0961	-10.6681	2.94	0	1	30.2498	-113.282	19.025	24.1294	30.1	1349.59	80.5222	12.4831	162.055	0.950142	0.0361871	5.34931	0	0	0	0	0	0	0	0	0	1	0	0
BaseCase_2030	2030	3	-120.261	-33.2032	-108.639	21.3779	34.7025	19.1016	55.7439	68.1719	2.94	0	1.5	30.2498	-113.282	19.025	24.1294	30.1	1349.59	80.5222	12.4831	162.055	0.950142	0.0361871	15.601	0	0	0	1	1	1	1	1	0	1	0	0
BaseCase_2030	2030	3	-120.261	-33.2032	43.8495	156.179	187.128	169.41	213.424	225.852	2.94	0	2.5	30.2498	-113.282	19.025	24.1294	30.1	1349.59	80.5222	12.4831	162.055	0.950142	0.0361871	17.7179	0	0	1	1	1	1	1	1	0	1	0	0
BaseCase_2030	2030	3	-120.261	-33.2032	120.967	232.136	264.233	246.059	292.264	304.692	2.94	0	3	30.2498	-113.282	19.025	24.1294	30.1	1349.59	80.5222	12.4831	162.055	0.950142	0.0361871	18.174	0	0	1	1	1	1	1	1	0	1	0	0
BaseCase_2030	2030	3	-121.134	-33.2032	-32.8427	82.3781	110.458	92.5375	134.584	147.012	2.94	0	2	30.2498	-113.282	19.025	24.1294	30.1	1349.59	80.5222	12.4831	162.055	0.950142	0.0361872	17.9202	0	0	0	1	1	1	1	1	0	1	0	0
HighWindTaxCapRes_2030	2030	3	-82.854	12.6271	-60.5482	72.8211	88.0968	25.5035	128.257	134.962	2.94	60	2	37.4891	-3.8e-06	36.589	40.1	46.577	202.88	23.9098	1.27489	8.24416	0.233463	0.0877206	62.5932	0	1	0	1	1	1	1	1	0	0	1	0
HighWindTaxCapRes_2030	2030	3	-81.8209	12.6271	-130.143	38.2406	20.0659	-55.8385	-29.4227	-22.7176	2.94	60	1	37.4891	-3.8e-06	36.589	40.1	46.577	202.88	23.9098	1.27489	8.24416	0.233463	0.0877206	7.43883	0	1	0	1	1	0	0	0	0	0	1	0
HighWindTaxCapRes_2030	2030	3	-81.8209	12.6271	-111.614	55.2821	38.1613	-29.7131	49.4173	56.1224	2.94	60	1.5	37.4891	-3.8e-06	36.589	40.1	46.577	202.88	23.9098	1.27489	8.24416	0.233463	0.0877206	25.5342	0	1	0	1	1	0	1	1	0	0	1	0
HighWindTaxCapRes_2030	2030	3	-81.8209	12.6271	11.7007	98.3863	160.126	98.7292	207.097	213.802	2.94	60	2.5	37.4891	-3.8e-06	36.589	40.1	46.577	202.88	23.9098	1.27489	8.24416	0.233463	0.0877206	61.3967	0	1	1	1	1	1	1	1	0	0	1	0
HighWindTaxCapRes_2030	2030	3	-81.8209	12.6271	87.3462	149.467	235.685	174.862	285.937	292.642	2.94	60	3	37.4891	-3.8e-06	36.589	40.1	46.577	202.88	23.9098	1.27489	8.24416	0.233463	0.0877206	60.8224	0	1	1	1	1	1	1	1	0	0	1	0
HighSolarTaxCapRes_2030	2030	3	-79.2896	16.0839	-54.2911	76.7933	94.2343	26.1789	128.004	134.46	2.94	60	2	38.285	-1.95096	33.0251	39.912	46.684	205.299	25.2377	1.6091	9.19151	0.294376	0.0641126	68.0554	0	1	0	1	1	1	1	1	0	0	1	0
HighSolarTaxCapRes_2030	2030	3	-78.3397	16.0839	-126.841	40.0472	23.0385	-53.7306	-29.6763	-23.2204	2.94	60	1	38.285	-1.95096	33.0251	39.912	46.684	205.299	25.2377	1.6091	9.19151	0.294376	0.0641126	6.95459	0	1	0	1	1	0	0	0	0	0	1	0
HighSolarTaxCapRes_2030	2030	3	-78.3397	16.0839	-106.46	57.7475	42.8644	-29.3285	49.1637	55.6196	2.94	60	1.5	38.285	-1.95096	33.0251	39.912	46.684	205.299	25.2377	1.6091	9.19151	0.294376	0.0641126	26.7805	0	1	0	1	1	0	1	1	0	0	1	0
HighSolarTaxCapRes_2030	2030	3	-78.3397	16.0839	12.9461	106.092	161.104	95.1822	206.844	213.3	2.94	60	2.5	38.285	-1.95096	33.0251	39.912	46.684	205.299	25.2377	1.6091	9.19151	0.294376	0.0641126	65.9215	0	1	1	1	1	1	1	1	0	0	1	0
HighSolarTaxCapRes_2030	2030	3	-78.3397	16.0839	88.0333	158.924	236.036	170.724	285.684	292.14	2.94	60	3	38.285	-1.95096	33.0251	39.912	46.684	205.299	25.2377	1.6091	9.19151	0.294376	0.0641126	65.3121	0	1	1	1	1	1	1	1	0	0	1	0
BaseCaseTaxCapRes_2030	2030	3	-74.6752	26.8196	-57.7351	64.2034	90.0964	8.02937	127.186	132.838	2.94	60	2	40.8521	-1.44e-06	37.342	40.1	45.541	209.1	23.2445	2.21713	13.8002	0.352095	0.060627	63.2768	0	1	0	1	1	1	1	1	0	0	1	0
BaseCaseTaxCapRes_2030	2030	3	-73.7684	26.8196	-122.437	40.1835	27.0356	-62.8705	-30.4943	-24.8421	2.94	60	1	40.8521	-1.44e-06	37.342	40.1	45.541	209.1	23.2445	2.21713	13.8002	0.352095	0.060627	0.216057	0	1	0	1	1	0	0	0	0	0	1	0
BaseCaseTaxCapRes_2030	2030	3	-73.7684	26.8196	-108.784	51.8785	40.1793	-44.9884	48.3457	53.9979	2.94	60	1.5	40.8521	-1.44e-06	37.342	40.1	45.541	209.1	23.2445	2.21713	13.8002	0.352095	0.060627	13.3597	0	1	0	1	1	0	1	1	0	0	1	0
BaseCaseTaxCapRes_2030	2030	3	-73.7684	26.8196	12.6443	86.7674	160.165	79.6444	206.026	211.678	2.94	60	2.5	40.8521	-1.44e-06	37.342	40.1	45.541	209.1	23.2445	2.21713	13.8002	0.352095	0.060627	80.5206	0	1	1	1	1	1	1	1	0	0	1	0
BaseCaseTaxCapRes_2030	2030	3	-73.7684	26.8196	87.9109	138.557	235.366	155.504	284.866	290.518	2.94	60	3	40.8521	-1.44e-06	37.342	40.1	45.541	209.1	23.2445	2.21713	13.8002	0.352095	0.060627	79.8617	0	1	1	1	1	1	1	1	0	0	1	0
WinterNYTaxCapRes_2030	2030	3	-71.6226	30.9754	-62.8576	63.7582	84.5437	-1.92389	126.876	132.223	2.94	60	2	41.8251	7.11e-08	37.718	43.683	47.4337	223.234	21.0337	1.76945	10.4959	0.306065	0.0453158	53.5684	0	1	0	1	1	0	1	1	1	0	0	0
WinterNYTaxCapRes_2030	2030	3	-70.7342	30.9754	-119.522	41.4546	29.6219	-63.4579	-30.8043	-25.4569	2.94	60	1	41.8251	7.11e-08	37.718	43.683	47.4337	223.234	21.0337	1.76945	10.4959	0.306065	0.0453158	-1.35343	0	1	0	1	1	0	0	0	1	0	0	0
WinterNYTaxCapRes_2030	2030	3	-70.7342	30.9754	-107.015	52.3393	33.2059	-49.588	48.0357	53.3831	2.94	60	1.5	41.8251	7.11e-08	37.718	43.683	47.4337	223.234	21.0337	1.76945	10.4959	0.306065	0.0453158	2.23049	0	1	0	1	1	0	1	1	1	0	0	0
WinterNYTaxCapRes_2030	2030	3	-70.7342	30.9754	10.4524	82.7466	157.535	71.9987	205.716	211.063	2.94	60	2.5	41.8251	7.11e-08	37.718	43.683	47.4337	223.234	21.0337	1.76945	10.4959	0.306065	0.0453158	85.5363	0	1	1	1	1	1	1	1	1	0	0	0
WinterNYTaxCapRes_2030	2030	3	-70.7342	30.9754	86.507	125.81	233.565	148.565	284.556	289.903	2.94	60	3	41.8251	7.11e-08	37.718	43.683	47.4337	223.234	21.0337	1.76945	10.4959	0.306065	0.0453158	84.9994	0	1	1	1	1	1	1	1	1	0	0	0
HighWindTax_2030	2030	3	-36.9098	56.4357	-85.2061	83.9529	69.4371	-56.0009	-31.8352	-27.5009	2.94	60	1	45.0606	-1.61e-07	36.589	43.4	48.711	1800	89.5046	15.129	263.435	0.862821	0.0913238	13.0013	0	1	0	1	1	0	0	0	0	0	0	1
HighWindTax_2030	2030	3	-36.9098	56.4357	-65.9534	102.058	88.4037	-30.9207	47.0048	51.3391	2.94	60	1.5	45.0606	-1.61e-07	36.589	43.4	48.711	1800	89.5046	15.129	263.435	0.862821	0.0913238	31.968	0	1	0	1	1	0	1	1	0	0	0	1
HighWindTax_2030	2030	3	-36.9098	56.4357	45.5317	144.563	198.497	86.1104	204.685	209.019	2.94	60	2.5	45.0606	-1.61e-07	36.589	43.4	48.711	1800	89.5046	15.129	263.435	0.862821	0.0913238	112.386	0	1	1	1	1	1	1	1	0	0	0	1
HighWindTax_2030	2030	3	-36.9098	56.4357	118.899	187.768	271.662	159.625	283.525	287.859	2.94	60	3	45.0606	-1.61e-07	36.589	43.4	48.711	1800	89.5046	15.129	263.435	0.862821	0.0913238	112.037	0	1	1	1	1	1	1	1	0	0	0	1
HighWindTax_2030	2030	3	-37.9644	56.4357	-21.7514	120.622	131.547	17.0026	125.845	130.179	2.94	60	2	45.0606	-1.61e-07	36.589	43.4	48.711	1800	89.5046	15.129	263.435	0.862821	0.0913238	75.1112	0	1	0	1	1	1	1	1	0	0	0	1
HighSolarTax_2030	2030	3	-37.8666	56.6677	-86.3712	80.3492	67.3275	-56.671	-31.9542	-27.7367	2.94	60	1	45.4338	-6.02e-07	34.1537	40.1	47.731	1800	85.8702	13.8727	229.218	0.833057	0.0653255	10.6598	0	1	0	1	1	0	0	0	0	0	0	1
HighSolarTax_2030	2030	3	-37.8666	56.6677	-66.5563	97.9844	86.6891	-34.7147	46.8858	51.1033	2.94	60	1.5	45.4338	-6.02e-07	34.1537	40.1	47.731	1800	85.8702	13.8727	229.218	0.833057	0.0653255	30.0214	0	1	0	1	1	0	1	1	0	0	0	1
HighSolarTax_2030	2030	3	-37.8666	56.6677	46.9767	143.982	199	83.5893	204.566	208.783	2.94	60	2.5	45.4338	-6.02e-07	34.1537	40.1	47.731	1800	85.8702	13.8727	229.218	0.833057	0.0653255	115.41	0	1	1	1	1	1	1	1	0	0	0	1
HighSolarTax_2030	2030	3	-37.8666	56.6677	120.247	192.61	272.068	155.788	283.406	287.623	2.94	60	3	45.4338	-6.02e-07	34.1537	40.1	47.731	1800	85.8702	13.8727	229.218	0.833057	0.0653255	116.28	0	1	1	1	1	1	1	1	0	0	0	1
HighSolarTax_2030	2030	3	-38.9671	56.6677	-18.0365	116.619	134.359	16.4966	125.726	129.943	2.94	60	2	45.4338	-6.02e-07	34.1537	40.1	47.731	1800	85.8702	13.8727	229.218	0.833057	0.0653255	77.6913	0	1	0	1	1	1	1	1	0	0	0	1
BaseCaseTax_2030	2030	3	-34.4168	65.8521	-83.0942	79.5795	70.14	-64.6089	-32.6721	-29.1602	2.94	60	1	47.6871	-1.02e-07	37.342	43.4	47.28	1800	82.4753	15.4157	277.577	0.850543	0.0589257	4.28783	0	1	0	1	1	0	0	0	0	0	0	1
BaseCaseTax_2030	2030	3	-34.4168	65.8521	-69.6143	91.6871	83.227	-49.0652	46.1679	49.6798	2.94	60	1.5	47.6871	-1.02e-07	37.342	43.4	47.28	1800	82.4753	15.4157	277.577	0.850543	0.0589257	17.3748	0	1	0	1	1	0	1	1	0	0	0	1
BaseCaseTax_2030	2030	3	-34.4168	65.8521	42.3871	124.253	193.701	65.915	203.848	207.36	2.94	60	2.5	47.6871	-1.02e-07	37.342	43.4	47.28	1800	82.4753	15.4157	277.577	0.850543	0.0589257	127.786	0	1	1	1	1	1	1	1	0	0	0	1
BaseCaseTax_2030	2030	3	-34.4168	65.8521	116.238	168.537	267.426	139.094	282.688	286.2	2.94	60	3	47.6871	-1.02e-07	37.342	43.4	47.28	1800	82.4753	15.4157	277.577	0.850543	0.0589257	128.332	0	1	1	1	1	1	1	1	0	0	0	1
BaseCaseTax_2030	2030	3	-35.5021	65.8521	-24.853	104.107	126.829	-3.07108	125.008	128.52	2.94	60	2	47.6871	-1.02e-07	37.342	43.4	47.28	1800	82.4753	15.4157	277.577	0.850543	0.0589257	60.9769	0	1	0	1	1	0	1	1	0	0	0	1
WinterNYTax_2030	2030	3	-38.1019	65.1672	-86.9359	72.9662	65.0976	-65.9953	-32.7731	-29.3604	2.94	60	1	48.004	1.36e-08	44.036	46.224	51.965	1800	44.4711	22.4425	734.263	0.684513	0.0355123	-0.0696125	0	1	0	1	1	0	0	0	0	1	0	0
WinterNYTax_2030	2030	3	-38.1019	65.1672	-76.5888	82.3271	75.329	-56.5845	46.0669	49.4796	2.94	60	1.5	48.004	1.36e-08	44.036	46.224	51.965	1800	44.4711	22.4425	734.263	0.684513	0.0355123	10.1617	0	1	0	1	1	0	1	1	0	1	0	0
WinterNYTax_2030	2030	3	-38.1019	65.1672	19.739	104.676	169.653	43.8014	203.747	207.16	2.94	60	2.5	48.004	1.36e-08	44.036	46.224	51.965	1800	44.4711	22.4425	734.263	0.684513	0.0355123	104.486	0	1	1	1	1	1	1	1	0	1	0	0
WinterNYTax_2030	2030	3	-38.1019	65.1672	93.8405	130.789	243.613	118.189	282.587	286	2.94	60	3	48.004	1.36e-08	44.036	46.224	51.965	1800	44.4711	22.4425	734.263	0.684513	0.0355123	125.423	0	1	1	1	1	1	1	1	0	1	0	0
WinterNYTax_2030	2030	3	-39.061	65.1672	-46.4936	91.9201	103.961	-23.8115	124.907	128.32	2.94	60	2	48.004	1.36e-08	44.036	46.224	51.965	1800	44.4711	22.4425	734.263	0.684513	0.0355123	38.7941	0	1	0	1	1	0	1	1	0	1	0	0
MiNg_$100_ERCOT_2035	2035	4	-56.5216	16.2917	-8.07091	161.876	144.866	83.9083	135.59	140.662	2.64	100	2	33.6606	0	0	30.385	70.13	186.42	35.2975	0.482471	-0.945429	0.599717	0.07461	60.9582	0	1	0	1	1	1	1	1	0	0	0	1
MiNg_$100_ERCOT_2035	2035	4	-55.7335	18.5091	-96.8943	85.7289	55.9669	-4.24298	-22.0896	-17.0182	2.64	100	1	33.6606	0	0	30.385	70.13	186.42	35.2975	0.482471	-0.945429	0.599717	0.07461	37.4577	0	1	0	1	1	0	0	0	0	0	0	1
MiNg_$100_ERCOT_2035	2035	4	-55.7335	18.5091	-56.437	122.551	96.1809	37.0989	56.7504	61.8218	2.64	100	1.5	33.6606	0	0	30.385	70.13	186.42	35.2975	0.482471	-0.945429	0.599717	0.07461	59.082	0	1	0	1	1	1	1	1	0	0	0	1
MiNg_$100_ERCOT_2035	2035	4	-55.7335	18.5091	44.0849	205.778	196.413	139.57	214.43	219.502	2.64	100	2.5	33.6606	0	0	30.385	70.13	186.42	35.2975	0.482471	-0.945429	0.599717	0.07461	56.8427	0	1	1	1	1	1	1	1	0	0	0	1
MiNg_$100_ERCOT_2035	2035	4	-55.7335	18.5091	103.64	254.046	255.445	201.462	293.27	298.342	2.64	100	3	33.6606	0	0	30.385	70.13	186.42	35.2975	0.482471	-0.945429	0.599717	0.07461	53.9827	0	1	1	1	1	1	1	1	0	0	0	1
MiNg_$100_MISO-W_2035	2035	4	-27.5124	42.9089	28.9138	187.66	169.827	77.9141	162.969	165.909	1.69	100	2	35.1235	0	0	42.12	69.24	145.07	34.4469	0.142891	-1.71473	0.793295	0.100222	91.9131	0	1	1	1	1	1	1	1	0	0	0	1
MiNg_$100_MISO-W_2035	2035	4	-27.1757	44.0481	-49.5992	111.074	91.0815	1.55975	5.28902	8.22921	1.69	100	1	35.1235	0	0	42.12	69.24	145.07	34.4469	0.142891	-1.71473	0.793295	0.100222	47.0334	0	1	0	1	1	1	1	1	0	0	0	1
MiNg_$100_MISO-W_2035	2035	4	-27.1757	44.0481	-11.5073	149.107	129.164	40.094	84.129	87.0692	1.69	100	1.5	35.1235	0	0	42.12	69.24	145.07	34.4469	0.142891	-1.71473	0.793295	0.100222	85.1156	0	1	0	1	1	1	1	1	0	0	0	1
MiNg_$100_MISO-W_2035	2035	4	-27.1757	44.0481	76.4767	225.283	216.655	126.799	241.809	244.749	1.69	100	2.5	35.1235	0	0	42.12	69.24	145.07	34.4469	0.142891	-1.71473	0.793295	0.100222	89.8562	0	1	1	1	1	1	1	1	0	0	0	1
MiNg_$100_MISO-W_2035	2035	4	-27.1757	44.0481	136.782	264.533	276.225	188.004	320.649	323.589	1.69	100	3	35.1235	0	0	42.12	69.24	145.07	34.4469	0.142891	-1.71473	0.793295	0.100222	88.2208	0	1	1	1	1	1	1	1	0	0	0	1
MiNg_$100_NYISO_2035	2035	4	-8.99006	56.0444	73.1249	224.003	207.821	92.8863	179.646	181.552	1.12	100	2	35.2188	0	0	1.41	74.6625	182.14	40.0583	0.487904	-1.19525	0.685603	0.114546	114.934	0	1	1	1	1	1	1	1	0	0	0	1
MiNg_$100_NYISO_2035	2035	4	-8.56581	56.6449	-14.3185	136.497	120.028	8.19997	21.9655	23.8719	1.12	100	1	35.2188	0	0	1.41	74.6625	182.14	40.0583	0.487904	-1.19525	0.685603	0.114546	63.3827	0	1	0	1	1	1	1	1	0	0	0	1
MiNg_$100_NYISO_2035	2035	4	-8.56581	56.6449	29.157	179.94	163.501	51.0018	100.806	102.712	1.12	100	1.5	35.2188	0	0	1.41	74.6625	182.14	40.0583	0.487904	-1.19525	0.685603	0.114546	106.856	0	1	1	1	1	1	1	1	0	0	0	1
MiNg_$100_NYISO_2035	2035	4	-8.56581	56.6449	118.638	266.872	252.829	143.154	258.486	260.392	1.12	100	2.5	35.2188	0	0	1.41	74.6625	182.14	40.0583	0.487904	-1.19525	0.685603	0.114546	109.675	0	1	1	1	1	1	1	1	0	0	0	1
MiNg_$100_NYISO_2035	2035	4	-8.56581	56.6449	171.739	310.457	305.368	197.903	337.326	339.232	1.12	100	3	35.2188	0	0	1.41	74.6625	182.14	40.0583	0.487904	-1.19525	0.685603	0.114546	107.464	0	1	1	1	1	1	1	1	0	0	0	1
MiNg_$100_PJM-W_2035	2035	4	32.051	111.553	4.58365	147.632	144.604	-34.3506	9.09615	7.5253	1.42	100	1	48.0117	0	8.06	63.575	76.9025	172.29	33.4736	-0.325041	-1.42697	0.702421	0.116823	33.0508	1	1	1	1	1	0	1	1	0	0	0	1
MiNg_$100_PJM-W_2035	2035	4	32.051	111.553	32.6802	173.89	172.661	-5.89911	87.9362	86.3653	1.42	100	1.5	48.0117	0	8.06	63.575	76.9025	172.29	33.4736	-0.325041	-1.42697	0.702421	0.116823	61.1084	1	1	1	1	1	0	1	1	0	0	0	1
MiNg_$100_PJM-W_2035	2035	4	32.051	111.553	99.9284	229.831	239.575	62.413	245.616	244.045	1.42	100	2.5	48.0117	0	8.06	63.575	76.9025	172.29	33.4736	-0.325041	-1.42697	0.702421	0.116823	128.022	1	1	1	1	1	1	1	1	0	0	0	1
MiNg_$100_PJM-W_2035	2035	4	32.051	111.553	145.816	259.853	284.664	111.712	324.456	322.885	1.42	100	3	48.0117	0	8.06	63.575	76.9025	172.29	33.4736	-0.325041	-1.42697	0.702421	0.116823	172.952	1	1	1	1	1	1	1	1	0	0	0	1
MiNg_$100_PJM-W_2035	2035	4	31.7013	111.859	64.0546	201.902	204.3	22.4781	166.776	165.205	1.42	100	2	48.0117	0	8.06	63.575	76.9025	172.29	33.4736	-0.325041	-1.42697	0.702421	0.116823	92.4407	1	1	1	1	1	1	1	1	0	0	0	1
MiNg_$100_CAISO_2035	2035	4	51.3644	129.691	77.7463	246.815	234.113	36.9206	140.575	138.93	2.26	100	2	52.9726	0	1.17	73.585	91.23	178.28	43.7191	-0.199732	-1.56826	0.725793	0.156735	104.422	1	1	1	1	1	1	1	1	0	0	0	1
MiNg_$100_CAISO_2035	2035	4	51.8662	130.844	15.4175	184.473	171.382	-25.2891	-17.1052	-18.75	2.26	100	1	52.9726	0	1.17	73.585	91.23	178.28	43.7191	-0.199732	-1.56826	0.725793	0.156735	40.5383	1	1	1	1	1	0	0	0	0	0	0	1
MiNg_$100_CAISO_2035	2035	4	51.8662	130.844	46.3073	215.278	202.27	8.12959	61.7348	60.09	2.26	100	1.5	52.9726	0	1.17	73.585	91.23	178.28	43.7191	-0.199732	-1.56826	0.725793	0.156735	71.4262	1	1	1	1	1	1	1	1	0	0	0	1
MiNg_$100_CAISO_2035	2035	4	51.8662	130.844	110.233	277.071	266.077	74.2306	219.415	217.77	2.26	100	2.5	52.9726	0	1.17	73.585	91.23	178.28	43.7191	-0.199732	-1.56826	0.725793	0.156735	135.233	1	1	1	1	1	1	1	1	0	0	0	1
MiNg_$100_CAISO_2035	2035	4	51.8662	130.844	147.39	308.184	302.87	113.65	298.255	296.61	2.26	100	3	52.9726	0	1.17	73.585	91.23	178.28	43.7191	-0.199732	-1.56826	0.725793	0.156735	172.026	1	1	1	1	1	1	1	1	0	0	0	1
MiNg_$150_MISO-W_2035	2035	4	-53.4896	8.90302	32.566	209.238	177.711	133.008	152.468	155.28	2.01	150	2	28.1323	0	0	0.25	70.01	162.06	40.3893	0.919726	-0.924047	0.888739	0.0613147	44.7032	0	1	1	1	1	1	1	1	0	0	0	1
MiNg_$150_MISO-W_2035	2035	4	-53.1063	10.3867	-73.9027	102.446	70.8607	30.3265	-5.2125	-2.39973	2.01	150	1	28.1323	0	0	0.25	70.01	162.06	40.3893	0.919726	-0.924047	0.888739	0.0613147	40.5342	0	1	0	1	1	1	0	0	0	0	0	1
MiNg_$150_MISO-W_2035	2035	4	-53.1063	10.3867	-20.7937	155.555	123.97	83.5663	73.6275	76.4403	2.01	150	1.5	28.1323	0	0	0.25	70.01	162.06	40.3893	0.919726	-0.924047	0.888739	0.0613147	40.4034	0	1	0	1	1	1	1	1	0	0	0	1
MiNg_$150_MISO-W_2035	2035	4	-53.1063	10.3867	87.3191	261.773	231.956	191.16	231.308	234.12	2.01	150	2.5	28.1323	0	0	0.25	70.01	162.06	40.3893	0.919726	-0.924047	0.888739	0.0613147	40.7964	0	1	1	1	1	1	1	1	0	0	0	1
MiNg_$150_MISO-W_2035	2035	4	-53.1063	10.3867	146.246	314.958	290.67	250.32	310.148	312.96	2.01	150	3	28.1323	0	0	0.25	70.01	162.06	40.3893	0.919726	-0.924047	0.888739	0.0613147	40.3504	0	1	1	1	1	1	1	1	0	0	0	1
MiNg_$150_NYISO_2035	2035	4	-8.28221	52.4213	-5.38784	149.589	130.025	26.0358	18.5222	18.0679	1.14	150	1	33.6724	0	0	0.27	92.62	229.17	48.6042	0.9018	-0.822167	0.832197	0.0861544	77.6037	0	1	0	1	1	1	1	1	0	0	0	1
MiNg_$150_NYISO_2035	2035	4	-8.28221	52.4213	47.317	202.281	182.73	79.9327	97.3622	96.9079	1.14	150	1.5	33.6724	0	0	0.27	92.62	229.17	48.6042	0.9018	-0.822167	0.832197	0.0861544	102.797	0	1	1	1	1	1	1	1	0	0	0	1
MiNg_$150_NYISO_2035	2035	4	-8.28221	52.4213	152.838	307.689	288.242	186.54	255.042	254.588	1.14	150	2.5	33.6724	0	0	0.27	92.62	229.17	48.6042	0.9018	-0.822167	0.832197	0.0861544	101.701	0	1	1	1	1	1	1	1	0	0	0	1
MiNg_$150_NYISO_2035	2035	4	-8.28221	52.4213	206.168	360.402	341.508	240.278	333.882	333.428	1.14	150	3	33.6724	0	0	0.27	92.62	229.17	48.6042	0.9018	-0.822167	0.832197	0.0861544	101.23	0	1	1	1	1	1	1	1	0	0	0	1
MiNg_$150_NYISO_2035	2035	4	-8.63188	50.801	100.305	255.686	236.089	127.94	176.202	175.748	1.14	150	2	33.6724	0	0	0.27	92.62	229.17	48.6042	0.9018	-0.822167	0.832197	0.0861544	108.149	0	1	1	1	1	1	1	1	0	0	0	1
MiNg_$150_ERCOT_2035	2035	4	-23.2813	45.5965	-62.3532	128.846	95.5779	16.7504	-26.2437	-24.8426	2.64	150	1	36.1843	0	0	0.18	92.95	204.49	46.6016	0.660465	-1.31376	0.851208	0.095942	49.9814	0	1	0	1	1	1	0	0	0	0	0	1
MiNg_$150_ERCOT_2035	2035	4	-23.2813	45.5965	-13.9734	175.744	143.883	63.7088	52.5963	53.9974	2.64	150	1.5	36.1843	0	0	0.18	92.95	204.49	46.6016	0.660465	-1.31376	0.851208	0.095942	80.1737	0	1	0	1	1	1	1	1	0	0	0	1
MiNg_$150_ERCOT_2035	2035	4	-23.2813	45.5965	87.6009	273.211	245.402	163.678	210.276	211.677	2.64	150	2.5	36.1843	0	0	0.18	92.95	204.49	46.6016	0.660465	-1.31376	0.851208	0.095942	81.7238	0	1	1	1	1	1	1	1	0	0	0	1
MiNg_$150_ERCOT_2035	2035	4	-23.2813	45.5965	139.764	323.598	297.52	218.418	289.116	290.517	2.64	150	3	36.1843	0	0	0.18	92.95	204.49	46.6016	0.660465	-1.31376	0.851208	0.095942	79.1012	0	1	1	1	1	1	1	1	0	0	0	1
MiNg_$150_ERCOT_2035	2035	4	-23.7152	41.9412	36.5717	224.161	194.833	107.89	131.436	132.837	2.64	150	2	36.1843	0	0	0.18	92.95	204.49	46.6016	0.660465	-1.31376	0.851208	0.095942	86.9429	0	1	1	1	1	1	1	1	0	0	0	1
MiNg_$150_CAISO_2035	2035	4	31.02	100.405	92.8574	272.325	249.409	94.8751	139.655	137.518	2.26	150	2	45.3465	0	0	1.53	105.405	203.01	53.7364	0.44352	-1.6434	0.881469	0.116924	149.005	1	1	1	1	1	1	1	1	0	0	0	1
MiNg_$150_CAISO_2035	2035	4	31.3808	101.135	0.889187	180.074	157.017	5.26375	-18.0251	-20.1621	2.26	150	1	45.3465	0	0	1.53	105.405	203.01	53.7364	0.44352	-1.6434	0.881469	0.116924	55.8821	1	1	1	1	1	1	0	0	0	0	0	1
MiNg_$150_CAISO_2035	2035	4	31.3808	101.135	46.6701	225.821	202.794	51.5561	60.8149	58.6779	2.26	150	1.5	45.3465	0	0	1.53	105.405	203.01	53.7364	0.44352	-1.6434	0.881469	0.116924	101.659	1	1	1	1	1	1	1	1	0	0	0	1
MiNg_$150_CAISO_2035	2035	4	31.3808	101.135	138.561	317.404	294.681	146.811	218.495	216.358	2.26	150	2.5	45.3465	0	0	1.53	105.405	203.01	53.7364	0.44352	-1.6434	0.881469	0.116924	147.87	1	1	1	1	1	1	1	1	0	0	0	1
MiNg_$150_CAISO_2035	2035	4	31.3808	101.135	184.831	363.339	340.915	194.9	297.335	295.198	2.26	150	3	45.3465	0	0	1.53	105.405	203.01	53.7364	0.44352	-1.6434	0.881469	0.116924	146.014	1	1	1	1	1	1	1	1	0	0	0	1
MiNg_$150_PJM-W_2035	2035	4	52.3102	126.339	110.186	254.401	253.761	57.6127	162.559	157.561	1.43	150	2	49.8141	0	0.15	47.84	98.48	181.06	45.7614	0.106801	-1.75696	0.812981	0.109773	127.422	1	1	1	1	1	1	1	1	0	0	0	1
MiNg_$150_PJM-W_2035	2035	4	52.5634	126.747	33.0294	180.372	176.272	-13.8271	4.87884	-0.118858	1.43	150	1	49.8141	0	0.15	47.84	98.48	181.06	45.7614	0.106801	-1.75696	0.812981	0.109773	49.5248	1	1	1	1	1	0	1	0	0	0	0	1
MiNg_$150_PJM-W_2035	2035	4	52.5634	126.747	70.8712	216.348	214.087	24.6748	83.7188	78.7211	1.43	150	1.5	49.8141	0	0.15	47.84	98.48	181.06	45.7614	0.106801	-1.75696	0.812981	0.109773	87.3405	1	1	1	1	1	1	1	1	0	0	0	1
MiNg_$150_PJM-W_2035	2035	4	52.5634	126.747	150.813	291.769	293.9	104.19	241.399	236.401	1.43	150	2.5	49.8141	0	0.15	47.84	98.48	181.06	45.7614	0.106801	-1.75696	0.812981	0.109773	167.153	1	1	1	1	1	1	1	1	0	0	0	1
MiNg_$150_PJM-W_2035	2035	4	52.5634	126.747	194.543	330.455	337.5	146.464	320.239	315.241	1.43	150	3	49.8141	0	0.15	47.84	98.48	181.06	45.7614	0.106801	-1.75696	0.812981	0.109773	191.036	1	1	1	1	1	1	1	1	0	0	0	1
NETL_ERCOT_GEN_0	2035	5	-167.036	-76.3719	-134.394	-4.89271	17.8149	51.5726	90.9211	105.677	4.42	0	2	31.1397	0.126198	27.8705	30.1394	34.3657	193.137	8.6573	1.34638	27.2128	0.0930944	0.0100272	-33.7577	0	0	0	0	1	1	1	1	1	0	0	0
NETL_ERCOT_GEN_0	2035	5	-166.35	-76.3719	-218.011	-76.8023	-96.9427	-64.2241	-66.7589	-52.0029	4.42	0	1	31.1397	0.126198	27.8705	30.1394	34.3657	193.137	8.6573	1.34638	27.2128	0.0930944	0.0100272	-32.7186	0	0	0	0	0	0	0	0	1	0	0	0
NETL_ERCOT_GEN_0	2035	5	-166.35	-76.3719	-207.966	-59.8926	-55.4714	-22.2356	12.0811	26.8371	4.42	0	1.5	31.1397	0.126198	27.8705	30.1394	34.3657	193.137	8.6573	1.34638	27.2128	0.0930944	0.0100272	-33.2358	0	0	0	0	0	0	1	1	1	0	0	0
NETL_ERCOT_GEN_0	2035	5	-166.35	-76.3719	-56.2347	65.0502	95.9419	129.819	169.761	184.517	4.42	0	2.5	31.1397	0.126198	27.8705	30.1394	34.3657	193.137	8.6573	1.34638	27.2128	0.0930944	0.0100272	-33.8768	0	0	0	1	1	1	1	1	1	0	0	0
NETL_ERCOT_GEN_0	2035	5	-166.35	-76.3719	22.4652	141.132	174.63	208.529	248.601	263.357	4.42	0	3	31.1397	0.126198	27.8705	30.1394	34.3657	193.137	8.6573	1.34638	27.2128	0.0930944	0.0100272	-33.8985	0	0	1	1	1	1	1	1	1	0	0	0
NETL_ERCOT_GEN_25	2035	5	-139.083	-23.6707	-193.032	-26.8816	-41.0353	-66.1544	-71.4807	-61.1589	4.42	25	1	40.702	0.126314	34.7532	40.6694	45.8509	345.554	11.9194	4.1028	88.4141	0.195077	0.0125112	-17.3646	0	0	0	0	0	0	0	0	1	0	0	0
NETL_ERCOT_GEN_25	2035	5	-139.083	-23.6707	-186.773	-20.602	-27.0324	-54.3131	7.35928	17.6811	4.42	25	1.5	40.702	0.126314	34.7532	40.6694	45.8509	345.554	11.9194	4.1028	88.4141	0.195077	0.0125112	-3.36172	0	0	0	0	0	0	1	1	1	0	0	0
NETL_ERCOT_GEN_25	2035	5	-139.083	-23.6707	-59.5394	35.4612	96.7436	70.7119	165.039	175.361	4.42	25	2.5	40.702	0.126314	34.7532	40.6694	45.8509	345.554	11.9194	4.1028	88.4141	0.195077	0.0125112	26.0317	0	0	0	1	1	1	1	1	1	0	0	0
NETL_ERCOT_GEN_25	2035	5	-139.083	-23.6707	18.3799	97.1005	174.581	148.67	243.879	254.201	4.42	25	3	40.702	0.126314	34.7532	40.6694	45.8509	345.554	11.9194	4.1028	88.4141	0.195077	0.0125112	25.911	0	0	1	1	1	1	1	1	1	0	0	0
NETL_ERCOT_GEN_25	2035	5	-139.818	-23.6707	-132.866	-3.07568	23.7218	-3.02489	86.1993	96.5211	4.42	25	2	40.702	0.126314	34.7532	40.6694	45.8509	345.554	11.9194	4.1028	88.4141	0.195077	0.0125112	26.7467	0	0	0	0	1	0	1	1	1	0	0	0
NETL_ERCOT_GEN_50	2035	5	-98.8082	20.3876	-118.652	35.2703	42.8781	-34.2537	82.0541	88.5084	4.42	50	2	48.4546	0.126314	41.4196	50.3226	54.4781	841.245	17.649	12.8409	513.117	0.321417	0.0233085	22.4905	0	1	0	1	1	0	1	1	1	0	0	0
NETL_ERCOT_GEN_50	2035	5	-98.0919	20.3876	-151.556	17.076	7.12841	-66.2234	-75.6259	-69.1716	4.42	50	1	48.4546	0.126314	41.4196	50.3226	54.4781	841.245	17.649	12.8409	513.117	0.321417	0.0233085	-13.2592	0	1	0	1	1	0	0	0	1	0	0	0
NETL_ERCOT_GEN_50	2035	5	-98.0919	20.3876	-145.135	22.447	17.4748	-59.1167	3.21408	9.66837	4.42	50	1.5	48.4546	0.126314	41.4196	50.3226	54.4781	841.245	17.649	12.8409	513.117	0.321417	0.0233085	-2.91285	0	1	0	1	1	0	1	1	1	0	0	0
NETL_ERCOT_GEN_50	2035	5	-98.0919	20.3876	-57.662	53.5355	102.756	27.2747	160.894	167.348	4.42	50	2.5	48.4546	0.126314	41.4196	50.3226	54.4781	841.245	17.649	12.8409	513.117	0.321417	0.0233085	75.4812	0	1	0	1	1	1	1	1	1	0	0	0
NETL_ERCOT_GEN_50	2035	5	-98.0919	20.3876	16.7731	85.6934	176.874	101.681	239.734	246.188	4.42	50	3	48.4546	0.126314	41.4196	50.3226	54.4781	841.245	17.649	12.8409	513.117	0.321417	0.0233085	75.1932	0	1	1	1	1	1	1	1	1	0	0	0
NETL_ERCOT_GEN_100	2035	5	-10.2261	110.845	-44.6843	121.474	126.42	-50.6737	73.6422	72.2421	4.42	100	2	64.341	0.126314	52.6912	67.5342	75.2203	1167.41	27.1999	11.4191	386.907	0.336991	0.0222389	15.5749	0	1	0	1	1	0	1	1	1	0	0	0
NETL_ERCOT_GEN_100	2035	5	-9.80191	110.845	-62.0562	107.533	106.21	-66.261	-84.0378	-85.4379	4.42	100	1	64.341	0.126314	52.6912	67.5342	75.2203	1167.41	27.1999	11.4191	386.907	0.336991	0.0222389	-4.63537	0	1	0	1	1	0	0	0	1	0	0	0
NETL_ERCOT_GEN_100	2035	5	-9.80191	110.845	-57.3836	112.353	114	-61.1427	-5.19782	-6.59793	4.42	100	1.5	64.341	0.126314	52.6912	67.5342	75.2203	1167.41	27.1999	11.4191	386.907	0.336991	0.0222389	3.15521	0	1	0	1	1	0	0	0	1	0	0	0
NETL_ERCOT_GEN_100	2035	5	-9.80191	110.845	-18.3572	132.01	151.927	-25.4186	152.482	151.082	4.42	100	2.5	64.341	0.126314	52.6912	67.5342	75.2203	1167.41	27.1999	11.4191	386.907	0.336991	0.0222389	41.0814	0	1	0	1	1	0	1	1	1	0	0	0
NETL_ERCOT_GEN_100	2035	5	-9.80191	110.845	27.2956	146.23	196.177	19.7886	231.322	229.922	4.42	100	3	64.341	0.126314	52.6912	67.5342	75.2203	1167.41	27.1999	11.4191	386.907	0.336991	0.0222389	85.3315	0	1	1	1	1	1	1	1	1	0	0	0
NETL_ERCOT_GEN_250	2035	5	257.293	377.951	203.672	374.471	398.712	-66.3714	-109.039	-133.772	4.42	250	1	111.265	0.126314	80.8868	125.269	140.145	1289.15	56.1503	4.56794	90.9332	0.232781	0.0387437	20.7608	1	1	1	1	1	0	0	0	1	0	0	0
NETL_ERCOT_GEN_250	2035	5	257.293	377.951	209.695	379.155	406.526	-61.7878	-30.1992	-54.9322	4.42	250	1.5	111.265	0.126314	80.8868	125.269	140.145	1289.15	56.1503	4.56794	90.9332	0.232781	0.0387437	28.5753	1	1	1	1	1	0	0	0	1	0	0	0
NETL_ERCOT_GEN_250	2035	5	257.293	377.951	238.782	398.716	435.272	-38.1327	127.481	102.748	4.42	250	2.5	111.265	0.126314	80.8868	125.269	140.145	1289.15	56.1503	4.56794	90.9332	0.232781	0.0387437	57.3207	1	1	1	1	1	0	1	1	1	0	0	0
NETL_ERCOT_GEN_250	2035	5	257.293	377.951	257.535	411.599	453.997	-21.9236	206.321	181.588	4.42	250	3	111.265	0.126314	80.8868	125.269	140.145	1289.15	56.1503	4.56794	90.9332	0.232781	0.0387437	76.0463	1	1	1	1	1	0	1	1	1	0	0	0
NETL_ERCOT_GEN_250	2035	5	256.862	377.951	221.55	388.339	418.216	-56.1282	48.6408	23.9078	4.42	250	2	111.265	0.126314	80.8868	125.269	140.145	1289.15	56.1503	4.56794	90.9332	0.232781	0.0387437	40.2646	1	1	1	1	1	0	1	1	1	0	0	0

## Sheet: Filterable Sortable Data Plots
																								*** Sphere size is proportional to: Profit(SOFC + SOEC) - max(Profit(SOFC), Profit(SOEC)). This is a proxy for the benefit of integration. Blue = +ive. White = -ive.
…..............................................................................................................................................................................................................................................................................................................................................................................................................…

## Sheet: SMR and ATR Calculations
SMR Hydrogen Cost with Capture
Source:	Lewis, Eric, McNaul, Shannon, Jamieson, Matthew, Henriksen, Megan S., Matthews, H. Scott, Walsh, Liam, Grove, Jadon, Shultz, Travis, Skone, Timothy J., and Stevens, Robert. Comparison of Commercial, State-of-the-Art, Fossil-Based Hydrogen Production Technologies. United States: N. p., 2022. Web. doi:10.2172/1862910.
	Comparison of Commercial, State-of-the-Art, Fossil-Based Hydrogen Production Technologies (Technical Report) | OSTI.GOV
See:	Case 2
		Original	Adjusted 1	Adjusted 2 (MiNg_$150_ERCOT_2035)
Exhibit 3-33	Power Cost ($/MWhr)	71.7	71.7	36.1843
Exhibit 3-33	Fuel Cost ($/MBTU)	4.42	4.42	2.64
Exhibit ES-2	Capacity Factor	0.9	0.9	1
Exhibit 3-23	Capacity (kg/s)	5.59	5	5
	Capacity Scaling Exponent	-	0.8	0.8
Exhibit 3-34	Fixed Cost ($/kg)	0.15	0.153384	0.138045
Exhibit 3-34	Capital Cost ($/kg)	0.33	0.337444	0.3037
Exhibit 3-33	Fuel Cost ($/kg)	0.82161	0.82161	0.490735
Exhibit 3-33	Electricity Cost ($/kg)	0.14489	0.14489	0.0731206
Calculated	Other Variable Cost ($/kg)	0.0971	0.0971	0.0971
Exhibit 3-33	Total excluding T&S ($/kg)	1.5436	1.55443	1.1027
Exhibit 3-33	CO2 T&S ($/kg)	0.1	0.1	0.1
Exhibit 3-33	Total with T&S ($/kg)	1.6436	1.65443	1.2027
Exhibit 3-33	Total Variable Operating Cost ($/kg)	0.24199
Exhibit 3-23	CO2 Capture	0.962	0.962	0.962
Exhibit 3-25	CO2 stack emissions (tonne/yr)	60298	60298	66997.8
		at 90% CF		at 100% CF
	H2 Selling Price ($/kg)	2	2	2
	Net Profit w/o Carbon Tax ($/yr)	80.457	70.2577	141.486
	Carbon Tax ($/tonne)	0	0	150
	Net Profit With Carbon Tax ($/yr)	80.457	70.2577	131.436
ATR Hydrogen Cost with Capture
Source:	Lewis, Eric, McNaul, Shannon, Jamieson, Matthew, Henriksen, Megan S., Matthews, H. Scott, Walsh, Liam, Grove, Jadon, Shultz, Travis, Skone, Timothy J., and Stevens, Robert. Comparison of Commercial, State-of-the-Art, Fossil-Based Hydrogen Production Technologies. United States: N. p., 2022. Web. doi:10.2172/1862910.
	Comparison of Commercial, State-of-the-Art, Fossil-Based Hydrogen Production Technologies (Technical Report) | OSTI.GOV
See:	Case 3
		Original	Adjusted 1	Adjusted 2 (MiNg_$150_ERCOT_2035)
Exhibit 3-48	Power Cost ($/MWhr)	71.7	71.7	36.1843
Exhibit 3-48	Fuel Cost ($/MBTU)	4.42	4.42	2.64
Exhibit ES-2	Capacity Factor	0.9	0.9	1
Exhibit 3-38	Capacity (kg/s)	7.63889	5	5
	Capacity Scaling Exponent	-	0.8	0.8
Exhibit 3-49	Fixed Cost ($/kg)	0.11	0.11973	0.107757
Exhibit 3-49	Capital Cost ($/kg)	0.26	0.282999	0.254699
Exhibit 3-48	Fuel Cost ($/kg)	0.77224	0.77224	0.461247
Exhibit 3-48	Electricity Cost ($/kg)	0.28727	0.28727	0.144975
Calculated	Other Variable Cost ($/kg)	0.07033	0.07033	0.07033
Exhibit 3-49	Total excluding T&S ($/kg)	1.49984	1.53257	1.03901
Exhibit 3-49	CO2 T&S ($/kg)	0.09	0.09	0.09
Exhibit 3-49	Total with T&S ($/kg)	1.59	1.62257	1.12901
Exhibit 3-48	Total Variable Operating Cost ($/kg)	0.3576
Exhibit 3-38	CO2 Capture	0.945	0.945	0.945
Exhibit 3-40	CO2 stack emissions	112140	112140	124600
		at 90% CF		at 100% CF
	H2 Selling Price ($/kg)	2	2	2
	Net Profit w/o Carbon Tax ($/yr)	120.489	73.7044	151.529
	Carbon Tax ($/tonne)	0	0	150
	Net Profit With Carbon Tax ($/yr)	120.489	73.7044	132.839
